1                    **The ‘squalene route’ to carotenoid biosynthesis is widespread in *Bacteria***

2                    Carlos Santana-Molina\*<sup>1</sup>, Valentina Henriques<sup>1</sup>, Damaso Hornero-Méndez<sup>2</sup>,

3                    Damien P. Devos\*<sup>1</sup>, Elena Rivas-Marin\*<sup>1</sup>

4  
5                    <sup>1</sup> Centro Andaluz de Biología del Desarrollo, CSIC, Campus Universidad Pablo de Olavide, Seville, Spain.

6                    <sup>2</sup> Instituto de la Grasa, CSIC, Campus Universidad Pablo de Olavide, Seville, Spain.

7                    \*Addresses for correspondence to CSM ([csantmol@gmail.com](mailto:csantmol@gmail.com)), DPD ([damienpdevos@gmail.com](mailto:damienpdevos@gmail.com)) and  
8                    ERM ([erivmar@upo.es](mailto:erivmar@upo.es)).

9  
10                   **Keywords:** squalene, C30 carotenoids, hopanoids, Planctomycetes, terpenoid evolution.

11  
12                   **Running title:** The ‘squalene route’ is widespread in *Bacteria*

13  
14                   **Abstract**

15                   Squalene is mostly associated with the biosynthesis of polycyclic triterpenes. Although there have been  
16                   suggestions that squalene could be involved in the biosynthesis of carotenoids, functionally and  
17                   evolutionarily related to polycyclic triterpenes, evidence of this ‘squalene route’ in nature was lacking. We  
18                   demonstrate that planctomycetes synthesize C30 carotenoids via squalene and that this ‘squalene route’ is  
19                   widely distributed in *Bacteria*. We also investigated the functional roles of hopanoids and carotenoids in  
20                   *Planctomycetes* and show that their protective functions under stress conditions are complementary. Our  
21                   evolutionary analyses suggest that the C30 carotenoid biosynthetic pathway is the most ancestral, with a  
22                   potential origin in *Firmicutes* or *Planctomycetes*. In addition, we propose an evolutionary scenario to explain  
23                   the diversification of the different carotenoid and squalene pathways. Together, these results improve the  
24                   evolutionary contextualization of these molecules. Likewise, the widespread occurrence of the squalene route  
25                   in bacteria increases the functional repertoire of squalene.

## 27 **Introduction**

28 Carotenoids are isoprenoid lipids found in all photosynthetic and some non-photosynthetic organisms. The  
29 most abundant carotenoids are produced by photosynthetic organisms and have C40 backbones, although  
30 some chemoorganotrophic bacteria are capable of producing *de novo* C30, C45 or C50 carotenoids (1, 2).

31 Carotenoid biosynthesis is evolutionarily related to the biosynthesis of polycyclic triterpenes, such as  
32 hopanoids and sterols, as the enzymes involved are homologues (3, 4). Squalene (C<sub>30</sub>H<sub>50</sub>) is the precursor of  
33 polycyclic triterpenes, which can be synthesized via two routes: the HpnCDE pathway, found mostly in  
34 bacteria; and squalene synthase (Sqs), a single enzyme found in the three domains of life. HpnC, HpnD and  
35 Sqs belong to the trans-isoprenyl diphosphate synthases head-to-head (Trans IPPS HH) family, to which the  
36 enzymes initiating C30 and C40 carotenoid biosynthesis also belong (Fig. S1). These Trans IPPS HHs  
37 generate the initial backbones of polycyclic triterpenes or carotenoids, which then become the substrate for  
38 specific amino oxidases (also known as phytoene desaturases): CrtN/P and HpnE act on C30 backbones, and  
39 CrtI/D or CrtP-Q/CrtH act on C40 backbones (Fig. S1).

40 The production of C30 carotenoids is widespread in *Bacteria*, but how the precursor is synthesized is  
41 unclear in most cases; thus far, bacterial C30 carotenoid production has been characterized only via CrtM,  
42 which is specific to *Firmicutes*. Some bacteria, such as planctomycetes, have C30-specific amino oxidases  
43 and subsequent carotenoid-modifying enzymes, but usually no Trans IPPS HHs associated with carotenoid  
44 precursor synthesis. Instead, planctomycetal genomes encode the HpnCDE enzymes responsible for squalene  
45 production, suggesting that squalene could be the substrate for these C30-specific amino oxidases (4). This  
46 possibility is supported by three observations. First, squalene can act as the substrate for C30- but not C40-  
47 specific amino oxidases, however, this ‘squalene route’ has only been artificially demonstrated so far (5).  
48 Second, a sterol synthesis-deficient mutant of the planctomycete *Gemmata obscuriglobus* that accumulates  
49 squalene shows a brighter red pigmentation (6). And third, interrupting the *hpnE* genes in the planctomycete  
50 *Planctopirus limnophila* and in the alphaproteobacterium *Methylobacterium extorquens* results in non-  
51 pigmented colonies due to the lack of carotenoid production (4, 7).

52 Carotenoids are also expected to be functionally related to polycyclic triterpenes. Carotenoids have important  
53 biological properties, including photoprotection and modification of the fluidity, permeability and stability of  
54 the cellular membranes (8–10). However, their functional similarities to and differences from polycyclic  
55 triterpenes are unclear.

56 Here, we investigate the synthesis of carotenoids in the planctomycete *P. limnophila*. We demonstrate the  
57 existence of the squalene route to carotenoid biosynthesis in nature and further report its widespread  
58 occurrence in *Bacteria*. We also investigate the potential roles of hopanoids and carotenoids in  
59 *Planctomycetes*, showing for the first time that these molecules have complementarity protective function in  
60 these bacteria. These novel insights, together with our evolutionary analyses, contextualize the ancestral  
61 diversification of terpenoid metabolism comprising polycyclic triterpenes and carotenoids. This report of the

62 widespread occurrence of the squalene route in *Bacteria* decouples squalene from the biosynthesis of  
63 polycyclic triterpenes, to which it has traditionally been associated, and increases its functional repertoire.

64

## 65 **Results**

### 66 **Planctomycetes produce C30 carotenoids using squalene as a precursor**

67 To decipher carotenoid production in planctomycetes, we performed random mutagenesis by Tn5  
68 transposition to select *P. limnophila* colonies with altered pigmentation. The transposition events in the  
69 selected clones mapped to the genes *hpnD*, *hpnE*, *crtN*, *crtP*, *aldH*, *crtQ* and *crtO*, which comprised all genes  
70 previously identified computationally with the exception of *hpnC* (4). We deleted *hpnC* by directed  
71 mutagenesis. The *hpnC*, *hpnD*, *hpnE* and *crtN* mutants, resulted in colorless colonies, while the other  
72 mutants showed colonies with altered pigmented, with colors ranging from light yellow to bright red (Fig. 1  
73 a).

74 We also constructed a hopanoid-deficient mutant by deleting the *shc* (squalene hopene cyclase) gene. The  
75 resulting colonies grew under standard conditions, thus discounting the essentiality of hopanoids in *P.*  
76 *limnophila*, in contrast to the essentiality of sterols in its close relative, *G. obscuriglobus* (6). The mutant  
77 colonies displayed an intense red color (Fig. 1a), indicating that the accumulated squalene (or its precursors)  
78 is re-directed towards carotenoid production, as observed in *M. extorquens* (7, 11). Indeed, we confirmed  
79 squalene production via HpnCDE using the  $\Delta crtN$ - $\Delta shc$  strain, since squalene is the precursor of hopanoids.  
80 The production and accumulation of squalene in this mutant was confirmed by gas chromatography with  
81 flame-ionization detection (GC-FID) (Fig. 1b). Together with the lack of color in the *hpnCDE* mutants (Fig.  
82 1a), these results suggest a role for squalene as an intermediate in carotenoid biosynthesis.

83 To characterize the carotenoid pigments produced by wild type *P. limnophila* and the selected mutants, the  
84 corresponding cell extracts were analyzed by high-performance liquid chromatography (HPLC), and UV-  
85 visible spectra were obtained for each peak. Wild type *P. limnophila* showed a complex HPLC profile with  
86 many peaks having UV-visible spectra in agreement with chromophore structures that have 11 to 13  
87 conjugated double bonds (Fig. 1c). The fact that most peaks presented almost identical UV-visible spectra  
88 but different chromatographic mobility suggested the possibility that these peaks corresponded to an array of  
89 different esterified forms. This was analyzed upon alkaline hydrolysis of wild type extract, which produced a  
90 simpler chromatogram (Fig. 1c), confirming the esterified nature of the pigments. Moreover, acidification of  
91 the hydrolyzed pigments solution was necessary to transfer them to organic solvent (diethyl ether),  
92 suggesting that the major pigments in the wild type were acidic carotenoids in which the native form was  
93 glycosyl esters, in agreement with previous studies (12). In fact, the spectroscopic (UV-visible and MS) and  
94 chromatographic properties of the major peaks in the saponified extract from wild type were in agreement  
95 with that of carotenoid acids derived from 4,4'-diapolycopene, a C30 carotenoid observed in other bacterial  
96 species such as *Methylobacterium rhodium* (formerly *Pseudomonas rhodos*) (13, 14), *Rubritella*  
97 *squalenifaciens* (15, 16), *Planococcus maritimus* (17) and *Bacillus firmus* (18). In addition, we did not find  
98 C40 carotenoids – such as lycopene, neurosporene and  $\beta$ -carotene – in wild type or mutants. Taking these

99 data together, we thus tentatively identified *P. limnophila* pigments as C30 carotenoids, the most  
100 predominant ones were carotenoid acids derived from 4,4'-diapolycopene (Fig. 1c). We note that carotenoids  
101 have been detected in the planctomycetes *Rhodopirellula rubra* LF2<sup>T</sup> and *Rubinisphaera brasiliensis* Gr7  
102 (19). However, the nature and biosynthetic pathways of these carotenoids are still unclear.  
103 To explore the action of the detected enzymes, pigment extracts from different mutants were analyzed by  
104 HPLC-DAD (Fig. 2 and Fig. S2). Additionally, the mass spectra for the most predominant compounds were  
105 obtained by HPLC-MS (APCI) (Fig. S3). The *hpnC*, *hpnD* and *hpnE* transposon mutants lacked carotenoids  
106 (Fig. 1d). Similarly, carotenoids were absent in the *crtN* mutant (Fig. 1b). The *crtP::tn5* mutant showed light  
107 orange pigmentation and accumulated 4,4'-diapolycopene (1) as the most predominant pigment (Fig. 2). The  
108 UV-visible of this compound (Fig. S2) confirmed the presence of eleven conjugated double bonds in its  
109 structure, and the mass spectrum (Fig. S3) showed a prominent ion corresponding to the protonated molecule  
110  $[M+H]^+$  at 401.31 which is consistent with the formula C<sub>30</sub>H<sub>40</sub> (Mw=400.31) of 4,4'-diapolycopene. All the  
111 pathway precursors, namely 4,4'-diaponeurosporene (2), 4,4'-diapo- $\zeta$ -carotene (3) and 4,4'-diapophytofluene  
112 (4), leading to the formation of 4,4'-diapolycopene by the action of CrtN (4,4'-diapophytoene desaturase)  
113 were also detected. The UV-visible spectra for these compounds (Fig. S2) agreed with the extension of the  
114 conjugated double bond system of the proposed structures (Fig. 3). The *aldH::tn5* mutant (interrupted in the  
115 gene coding for a carotenoid aldehyde dehydrogenase) showed red pigmentation and presented the expected  
116 carotenoids containing aldehyde end-groups such as 4,4'-diapolycopene-4-al (5) and 4,4'-diapolycopene-dial  
117 (7). Both, UV-visible and MS spectra (Fig. S2 and S3) were consistent with the proposed C30 structures.  
118 Interestingly, this mutant also accumulated other pigments that we provisionally identified, based on their  
119 UV-visible spectra and chromatographic properties, as hydroxy derivatives of 4,4'-diapolycopene: 4,4'-  
120 diapolycopene-4-ol (6) and 4,4'-diapolycopene-4,4'-diol (9). These two pigments presented the same UV-  
121 visible spectrum as that of 4,4'-diapolycopene (Fig. S2) but had higher polarity; hydroxylation is the only  
122 possible structural modification that would increase the polarity of the derivatives without modifying the  
123 chromophore properties. We also tentatively identified a carotenoid containing one aldehyde group and one  
124 hydroxy group: 4,4'-diapolycopene-4-ol-4'-al (8). The occurrence of hydroxylated diapolycopene derivatives  
125 raises the question of whether the introduction of hydroxy group is due to an additional hydroxylase activity  
126 of CrtP, to the action of an unknown hydroxylase enzyme, or even to a spontaneous step(20). The *crtQ::tn5*  
127 mutant accumulated carotenoid acids derived from the action of the carotenoid aldehyde dehydrogenase  
128 (*aldH*), namely 4,4'-diapolycopenoic acid (10), 4,4'-diapolycopene-4'-al-4-oic acid (11 & 11') and 4,4'-  
129 diapolycopene-4,4'-dioic acid (12). As shown before, these were also the major carotenoids found in the wild  
130 type extract. The structure for these C30 compounds were in accordance with their UV-visible and MS  
131 spectra (S 2 and S3). It is interesting to note that the carboxylic acid moiety can be formed not only by  
132 oxidation of an intermediary aldehyde (via AldH) but also by a putative reaction introducing a keto group  
133 into a carbon with a preexisting hydroxy group. In this way, both aldehyde and hydroxy 4,4'-diapolycopene  
134 derivatives would be transformed into the same carotenoid acid compounds. The *crtO::tn5* mutant contained  
135 pigments (peaks 13, 14, 15 and 16) with UV-visible spectra similar to those of 4,4'-diapolycopenoic acids

136 but with increased polarities, which were consistent with the acylation with sugar moieties to produce  
137 carotenoic acid glycosyl esters. The additional acylation of the sugar derivatives with different fatty acids by  
138 the action of CrtO (acyl transferase) produced the complex pigment profile observed in the wild type strain  
139 (Fig. 1d). Additional experimental work is needed to identify both the sugar moieties and the fatty acids  
140 involved in the formation of the carotenoid acid glycosyl derivatives responsible for the native carotenoid  
141 profile and color of *P. limnophila*.

#### 142 **Heterologous reconstruction in *Escherichia coli***

143 To corroborate the synthesis of carotenoids from squalene in *P. limnophila*, we assembled a heterologous  
144 expression system in *E. coli* BL21, a strain that lacks both carotenoids and hopanoids. *E. coli* was  
145 simultaneously transformed with three plasmids (Table S3). The first plasmid ensured isopentenyl  
146 diphosphate (IPP) production, to enhance the biosynthesis of isoprenoid derivatives. The second plasmid  
147 carried the squalene synthesis genes (*hpnCDE* or *sqs*). Different versions of the third plasmid contained the  
148 downstream carotenoid modification genes in an additive fashion (*crtN*, *crtP*, *aldH*, *crtO* and *crtQ*). In  
149 addition to these strains, alternative versions of plasmid 2 were also constructed and used as controls. One  
150 version contained only the *hpnC* and *hpnD* genes. Colonies containing this plasmid were colorless,  
151 confirming that carotenoids were produced via squalene and not via intermediates of the HpnCDE pathway  
152 (Fig. S4). Another version contained the cyanobacterial *sqs* gene for squalene production. An *E. coli* strain  
153 containing this plasmid yielded the same carotenoids as the strain with the plasmid bearing the *hpnCDE*  
154 genes, although with different proportions, which confirmed that both pathways are equivalent for carotenoid  
155 synthesis (Fig. S4). HPLC analysis verified that *E. coli* expressing the whole pathway produced a mixture of  
156 carotenoids, including 4,4'-diapolycopene (the most abundant), 4,4'-diapolycopene-4-al, 4,4'-diapolycopene-  
157 4'-al-4-oic acid, 4,4'-diapolycopene-4,4'-dioic acid and 4,4'-diapolycopenoic acid. The glycosyl- and ester-  
158 modified carotenoids did not appear in the *E. coli* extracts, unlike in the *P. limnophila* extracts, although  
159 similar precursors were observed (Fig. 2 and Fig. S4).

160 Compiling the results from genetic, bioinformatic and carotenoid analyses, we propose a tentative pathway  
161 for the synthesis of C30 carotenoids in *P. limnophila* via the squalene route (Fig. 3).

#### 162 **Functional characterization of C30 carotenoids and hopanoids in *P. limnophila***

163 To study the role of each of the triterpenoids, we constructed deletion mutants of some of the genes  
164 previously inserted by random mutagenesis. We selected the following *P. limnophila* strains to study the  
165 functional role of each terpenoid in isolation: *P. limnophila*  $\Delta shc$  and  $\Delta crtN$ , which do not produce  
166 hopanoids or carotenoids, respectively;  $\Delta crtN$ - $\Delta shc$ , which produces squalene but not hopanoids or  
167 carotenoids; and  $\Delta hpnD$ , which is unable to produce any of these molecules. We observed no statistically  
168 significant difference in growth rate between the mutants and the wild type, even when they were grown at  
169 different temperatures (Fig. 4a; Fig. S5a). However, growth of the  $\Delta hpnD$  and the  $\Delta crtN$ - $\Delta shc$  mutant strains  
170 was slower when the strain was grown on solid plates with 1.5 % agar the absence of stress (Fig. S5b). In the  
171 case of the  $\Delta crtN$ - $\Delta shc$  mutant the wild type growth was recovered when grown at 1 % agar (Fig. S5b). To  
172 establish the physiological roles of each molecule, we analyzed the mutants under different stress conditions,



173 including desiccation, osmotic stress and oxidative stress (Fig. 4b-c). We found that *P. limnophila*  
174 carotenoids or hopanoids are not linked to any specific protection against a particular stress. However, we  
175 observed a general cumulative effect: all triterpenoids are associated with protection against the tested  
176 stresses in an incremental fashion. Squalene is slightly protective, and carotenoids and hopanoids have  
177 additive protective functions. However, in the case of carotenoids and hopanoids, we cannot rule out the  
178 possibility that the elimination of one molecule by interrupting one pathway was compensated by the  
179 overproduction of the other molecule. This possibility is supported by the brighter red pigmentation observed  
180 in the *G. obscuriglobus* and *P. limnophila* mutant strains lacking sterol and hopanoid, respectively.

181 Finally, the different mutant strains, together with the wild type, were exposed to several freeze/thaw cycles,  
182 as carotenoids have been shown to be protective against ice-induced membrane defects (10). The viability of  
183 neither the mutants nor the wild type was affected, even after three cycles of freeze/thaw (data not shown).

#### 184 **Evolution of the C30 carotenoid pathway**

185 We next reconstructed the evolutionary history of the main enzymes that define the carotenoid biosynthetic  
186 pathways, the amino oxidases. The inferred phylogenies of CrtN and CrtP provided congruent topologies,  
187 which suggests that these enzymes have a common evolutionary history (Fig. 5). This phylogenetic  
188 congruency is in agreement with the fact that these genes form an operon together with other carotenoid-  
189 related genes, such as *aldH*, *crtQ* or *crtO*, in most genomes (Fig. S6). CrtN is more widespread than CrtP,  
190 which could be related to the fact that it is the first amino oxidase enzyme in the pathway, responsible for  
191 joining the two C15 subunits into the C30 backbone. The CrtN/P phylogeny shows a taxonomically mixed  
192 topology characterized by *Firmicutes-Bacilli* (and *Clostridia*, which contain only CrtN) branching  
193 paraphyletically and basally in the respective subfamilies. Embedded in this group are other bacterial orders  
194 such as *Verrucomicrobiales*, *Acidobacteriales* and *Methylococcales*, among others. Another main basal  
195 branch in the CrtN/P phylogeny is composed of the *Planctomycetes* phylum (classes *Planctomycetia* and  
196 *Phycisphaerae*), which contains other taxonomic groups embedded paraphyletically. These groups  
197 encompass bacterial orders with few representatives, such as *Rhizobiales*, *Acetobacteriales*,  
198 *Rhodobacterales*, *Acidobacteriales* and the euryarchaeal class *Candidatus Poseidoniiia*, among others, which  
199 contain only CrtN (including MGII archaea from *Candidatus Thermoplasmatota*). This taxonomic and  
200 phylogenetic distribution of the C30-specific amino oxidases suggests that there have been multiple lateral  
201 gene transfer events between prokaryotes, mainly from *Firmicutes-Bacilli* and *Planctomycetes*.

202 We next analyzed the potential source of the precursor of these carotenoid amino oxidases in the different  
203 organisms. We found that the biosynthesis of 4,4'-diapophytoene by CrtM is restricted to *Firmicutes*, while  
204 the squalene pathway (via HpnCDE or Sqs) is found in other organisms bearing the CrtN/P proteins (Fig. 5).  
205 This result shows that the C30-specific amino oxidases are usually associated with the presence of 4,4'-  
206 diapophytoene (in *Firmicutes*) or squalene biosynthesis, in agreement with our demonstration of C30  
207 carotenoid production from squalene. This is further supported by the presence of *hpnD* in the genomic  
208 context of *crtN* of the archaeal class *Ca. Poseidoniiia* or of *hpnCDE* in some alphaproteobacterial orders (Fig.  
209 S6; Data S2). Thus, our results show that the squalene route to carotenoid production is widespread in

210 *Bacteria* and that the C30 carotenoid pathway has been transferred multiple times. In addition, the  
211 biosynthesis of the precursor (4,4'-diapophytoene or squalene) has shifted between different groups.

## 212 **Origins of carotenoid pathways**

213 The taxonomic distribution of the genes involved in C30 carotenoid synthesis is more limited than that of  
214 squalene or hopanoids (4). This limited distribution narrows the possible taxonomic origin of C30 carotenoid  
215 pathways. There are two main pieces of evidence that suggest *Firmicutes* could be at the origin of C30  
216 carotenoids. One is that *Firmicutes* forms the most basal clades in the phylogeny of CrtN and CrtP (Fig. 5),  
217 which in this case could be sign of ancestry or of more intense divergence. The second piece of evidence  
218 is that *Firmicutes* are the only bacteria bearing CrtM, which suggests that the biosynthesis of C30  
219 carotenoids via 4,4'-diapophytoene originated in these organisms. Another interesting fact is the exclusive  
220 presence of CrtN in *Clostridia*, which represents an ancient anaerobic class of *Firmicutes* and thus, perhaps,  
221 an early origin of the CrtN subfamily. By contrast, the biosynthesis of C30 carotenoids via squalene shows  
222 an ancestral evolution in *Planctomycetes* and represents an alternative to the origin of C30 carotenoids that is  
223 independent of CrtM (4,4'-diapophytoene synthase).

224 The carotenoid amino oxidases usually work in pairs, and their evolution provides a broad view of how the  
225 different carotenoid pathways evolved. HpnE and CrtN/P act on C30 backbones, while CrtI/D and CrtP-Q/H  
226 act in the two main pathways for C40 carotenoid biosynthesis (Fig. S1). One of these pathways is present  
227 exclusively in aerobic *Cyanobacteria* and green sulfur anaerobic bacteria (*Chlorobi*), via CrtP-Q and CrtH  
228 (Fig. S7). CrtH is phylogenetically distant from the other families, while CrtP-Q from *Cyanobacteria* is  
229 closely related to HpnE. Thus, this C40 CrtP-Q/H pathway most likely originated in *Cyanobacteria* or  
230 *Chlorobi* with an origin related to HpnE and independent from the other C40 pathway. The other C40  
231 pathway, via CrtI/D, most likely had an ancestral evolution in *Proteobacteria*, *Bacteroidetes*, *Actinobacteria*  
232 and *Deinococcus*, among others, suggesting lateral gene transfer events between the ancestor of these phyla  
233 (Fig. S7). While CrtD is more conserved, CrtI has a limited distribution that is restricted mainly to  
234 *Proteobacteria* and *Actinobacteria*. However, *Bacteroidetes*, for example, has a different carotenoid amino  
235 oxidase for C40 carotenoid biosynthesis, CrtDb, instead of the 'classical' CrtI. This CrtDb has been  
236 transferred by lateral gene transfer between the ancestor of *Bacteroidetes*, *Actinobacteria*,  
237 *Thermoplasmatota*, *Halobacteria* and *Thermoprotei*, among others, where it is involved in C50 carotenoid  
238 biosynthesis (21). C50 carotenoids are derived from all-*trans*-lycopene (C40) (22), suggesting that the CrtDb  
239 subfamily emerged after the CrtN-P (C30) or CrtI-D (C40) subfamilies. In our controls, the location of CrtDb  
240 varies from basal to or intermediary between CrtI-N and CrtD-P subfamilies, showing the phylogenetic  
241 instability of this subfamily. However, the topology of the CrtI-N and CrtD-P clusters was stable in controls,  
242 except for some CrtP in *Firmicutes*, branching intermediary between CrtP and CrtD subfamilies (Fig. 6).

243 Enzymes of the C30 carotenoid pathway are closely related to those of the C40 carotenoid pathway of  
244 *Proteobacteria* (and others), but distantly related to those in cyanobacteria (Fig. 6). The presence of one  
245 Trans IPPS HH enzyme (CrtM or CrtB), two amino oxidases (CrtN-CrtP or CrtD-CrtI) and even a glucosyl-  
246 transferase (CrtQ or CrtX) in the C30 and C40 carotenoid operons, respectively, together with the fact that

247 CrtN-CrtI and CrtP-CrtD branch together, respectively, suggests that these C30 and C40 pathways have a  
248 common origin, possibly due to neofunctionalization of an operon. In the phylogeny of carotenoid amino  
249 oxidases, CrtN and CrtP are branching closer to the deep nodes (Fig. 6), which suggests that the C30  
250 carotenoid pathway diverged earlier than the C40 pathway. In agreement with this assumption, the direct  
251 evolution of the function of CrtB from CrtM has been demonstrated by random mutagenesis, but not the  
252 opposite (23). This assumption is further supported by the simpler molecular structure of C30 carotenoids, as  
253 they are generally formed by a linear and desaturated C30 backbone, which may also present one or two  
254 glucoses moieties at the acid extremes of the carotenoid molecule and a linear fatty acid radical linked to the  
255 sugar. By contrast, C40 carotenoids usually undergo cyclization at the extremes of the backbone, which add  
256 extra enzymatic steps involving the lycopene cyclases, the enzymes of the CrtY family. Together, these  
257 observations suggest that the C30 carotenoid pathway is ancestral to C40 (and C50) carotenoid biosynthesis  
258 and its most likely phylum of origin is *Firmicutes* or *Planctomycetes*, depending on whether it originated  
259 from 4,4'-diapophytoene or from squalene.

260

## 261 **Discussion**

262 Here, we characterize the biosynthesis of C30 carotenoids via squalene. This molecule has traditionally been  
263 associated with the biosynthesis of polycyclic triterpenes. We demonstrate that it can also serve as an  
264 intermediate for C30 carotenoid biosynthesis and that this 'squalene route' to C30 carotenoid biosynthesis is  
265 widespread in *Bacteria*. The carotenoid profile of *P. limnophila* is characterized by an array of C30  
266 carotenoids derived from 4,4'-diapophytoene, in which unusual red carotenoids with carboxylic acid moieties  
267 predominate. This structural feature raises the possibility of new industrial and pharmaceutical applications  
268 for these molecules, since carotenoic acids have higher polarity and water solubility than common  
269 carotenoids.

270 Our results show that both carotenoids and polycyclic triterpenes have similar protective roles against  
271 environmental stresses such as desiccation and salinity. The resistance to stress was not associated with any  
272 particular molecule, demonstrating that C30 carotenoids and hopanoids are functionally related in *P.*  
273 *limnophila*. However, the possibility of complementary overproduction to compensate for a deficiency could  
274 not be discounted. In addition, these apparently similar roles of carotenoids and hopanoids could be  
275 influenced by remodeling other membrane features, such as the ratio of saturated:unsaturated fatty acids, as  
276 has previously been shown (8, 10). We also demonstrate that the accumulation of squalene in the  $\Delta crtN$ - $\Delta shc$   
277 mutant is not toxic for the bacterium, but instead has a low, but apparent protective effect. Indeed, squalene  
278 can function by influencing membrane properties itself, as has been reported in *Halobacteria* (24), fungi (25)  
279 and mammals (26). These results provide further support for the related evolution between carotenoid and  
280 polycyclic triterpenes, and present squalene as a versatile compound in the evolution of triterpene  
281 derivatives.



282 The role of squalene as precursor of both carotenoids and polycyclic triterpenes raises important  
283 considerations for the diversification of these metabolites. C40 pathways have diversified more (CrtI-CrtD,  
284 CrtD-CrtI-50 or CrtP/Qc-CrtH) than the unique C30 carotenoid pathway. We infer that the C30 and C40  
285 pathways (via CrtI-CrtD) have a common origin by neofunctionalization of an operon, that the C30 pathway  
286 most likely originated in *Firmicutes* or in *Planctomycetes*, and that it is ancestral to the CrtI-Db C40  
287 pathway. We could also order the evolution of the pathways using the phylogenetic proximity between HpnE  
288 and CrtP-Qc. The HpnCDE enzymes show a more widespread and ancestral distribution in *Bacteria* (*i.e.*  
289 ancestral in phyla like *Actinobacteria*, *Planctomycetes* and *Proteobacteria*, among others<sup>5</sup>) than the CrtP-  
290 Q/H enzymes, which are present only in *Cyanobacteria* and *Chlorobi*, suggesting that squalene (HpnCDE)  
291 predates the cyanobacterial carotenoid pathway. Thus, the close relationship between the HpnE and CrtP-Qc  
292 subfamilies would imply that the cyanobacterial carotenoid pathway was derived from Hpn(CD)E-related  
293 enzymes. This is interesting, because *Cyanobacteria* shows the most ancestral association of Sqs with  
294 hopanoid biosynthesis. The related evolution of HpnE and CrtP-Qc (which raises the possibility that Trans  
295 IPPS HHs also co-evolved) supports the hypothesis that the origin of Sqs uncoupled polycyclic triterpenes  
296 from carotenoid biosynthesis, allowing the individualization of the pathways (4). Together, our results  
297 provide novel insights into the links between, and diversification of, carotenoid and polycyclic triterpene  
298 metabolisms, as well as optimizing the contextualization of these molecules, which are commonly used as  
299 biomarkers (27), throughout geological time scales. Our demonstration of the widespread occurrence of the  
300 squalene route to carotenoid biosynthesis increases the functional repertoire of squalene and establishes it as  
301 a general hub of polycyclic triterpenes and carotenoids biosynthesis.

## 302 **Methods**

### 303 **Bacterial strains and culture conditions**

304 The bacterial strains used in this work are listed in Table S1. *Escherichia coli* DH5 $\alpha$ , used for cloning  
305 purposes, and *E. coli* SoluBL21 (28), used for carotenoid analysis, were grown in lysogeny broth (LB)  
306 medium at 37°C. *E. coli* SoluBL21 bearing the expression plasmids was grown in LB-based ZYM-5052  
307 auto-induction medium(29). *Planctopirus limnophila* DSM3776<sup>T</sup> was cultivated in M3 modified medium  
308 (30), pH 7.5, at 28°C. We added 1.5% bacto-agar to solid media for *E. coli* and 1% for *P. limnophila*. When  
309 required, kanamycin (Km) or gentamycin (Gm) was used at 50 and 20  $\mu\text{g mL}^{-1}$  for *P. limnophila*. For *E. coli*,  
310 antibiotics were added at the following concentrations ( $\mu\text{g mL}^{-1}$ ): Km (25), Gm (10), chloramphenicol (Cl,  
311 15), ampicillin (Ap, 100). Methyl viologen dichloride hydrate (paraquat, 98% purity) and Isopropil- $\beta$ -D-1-  
312 tiogalactopiranósido (IPTG) were purchased from Merck.

### 313 **Plasmid construction**

314 The oligonucleotides and plasmids used in this work are summarized in Tables S2 and S3, respectively. All  
315 DNA manipulations were performed using standard protocols. Plasmids used for gene deletion in a double  
316 event of homologous recombination were derived from pEX18Tc vector (31), which is a suicide plasmid  
317 containing a tetracycline resistance gene. To construct knockout plasmids for the target genes,  
318 fragments containing 700–1400 bp sequences of the flanking region of the target genes were amplified by  
319 PCR from genomic DNA of *P. limnophila* using the primers summarized in Table S2. The upstream and  
320 downstream fragments were cloned into pEX18Tc by three-way ligation using the appropriate restriction  
321 enzymes listed in Table S2. Finally, the Km or Gm resistance genes from the pUTminiTn5km (32) or  
322 pBBR1MCS-5 (33) plasmid, respectively, were subsequently cloned as a *Bam*HI fragment between the  
323 flanking regions. Plasmids used for the reconstruction of carotenoid synthesis pathway in *E. coli* (Table S3)  
324 were divided into three categories: category 1, a plasmid that contains the genes required for the synthesis of  
325 the precursor IPP (Addgene); category 2, the plasmids necessary for squalene biosynthesis through squalene  
326 synthase (Sqs) or HpnCDE; and category 3, the plasmids that bear the genes required for carotenoid  
327 biosynthesis. All the genes contained in category 2 and 3 plasmids were amplified from genomic DNA using  
328 the pair of oligonucleotides listed in Table S2, cut with the appropriate restriction enzyme, and cloned into  
329 pBR322 (34) and pSEVA231 (35), respectively. The genes were expressed under the lacV5 promoter and a  
330 strong ribosome binding site. More details are presented in Table S3.

### 331 **Mutant strain construction**

332 Genetic transformations of *P. limnophila* for the construction of deletion mutants were performed by  
333 electroporation, as previously described (30). In summary, fresh electrocompetent cells were prepared from  
334 400 mL of a culture at OD<sub>600</sub> 0.4 in modified M3. The cells were washed twice with ice-cold double-distilled  
335 sterile water (100 mL and then 50 mL) and once with 2 mL of ice-cold 10% glycerol. The pellet was then  
336 resuspended in 400  $\mu\text{L}$  of ice-cold 10% glycerol, and aliquots of 100  $\mu\text{L}$  were dispensed into 0.1 mm gapped  
337 electroporation cuvettes along with 1  $\mu\text{g}$  of plasmid DNA and 1  $\mu\text{L}$  of Type-One restriction inhibitor

338 (Epicentre). Electroporation was performed with a Bio-Rad Micropulser (Ec3 pulse, voltage [V] 3.0 kV).  
339 Electroporated cells were immediately recovered in 1 mL of cold fresh medium and incubated at 28°C for 2  
340 h with shaking. The cells were then plated onto agar plates supplemented with Km or Gm and were incubated  
341 at 28°C until colony formation after approximately 7 days. Colonies were segregated onto fresh selection  
342 plates and genotyped by PCR and sequencing.

343 For random mutagenesis by transposition, 1  $\mu$ L of EZ-Tn5 solution and 1 mL of Type-One restriction  
344 inhibitor were electroporated following the aforementioned protocol. The cells were then plated onto  
345 modified M3 supplemented with Km and incubated at 28°C until colony formation. White colonies were  
346 segregated onto fresh selection plates. To verify Tn5 insertions and their locations, DNA was isolated using  
347 the Wizard Genomic DNA Purification Kit (Promega), and analyzed by semirandom PCR (36). Genomic  
348 DNA was used as the template DNA in a 20  $\mu$ L PCR mixture containing primer Map Tn5 A fwd and a mix  
349 of primers CEKG 2A, CEKG 2B and CEKG 2C; 1  $\mu$ L of a 1:5 dilution of this reaction mixture was used as  
350 the template DNA for a second PCR performed with primers Map Tn5 B fwd and CEKG 4. For the first  
351 reaction, the thermocycler conditions were 94°C for 2 min; followed by six cycles of 94°C for 30 s, 42°C for  
352 30 s (with the temperature reduced 1°C per cycle), and 72°C for 3 min; and then 25 cycles of 94°C for 30 s,  
353 65°C for 30 s, and 72°C for 3 min. For the second reaction, the thermocycler conditions were 30 cycles of  
354 94°C for 30 s, 65°C for 30 s, and 72°C for 3 min. The DNA of purified PCR products (GFX PCR DNA and  
355 Gel Band Purification Kit GE Healthcare) was sequenced using primer Map Tn5 B fwd.

### 356 **Carotenoid pathway reconstruction**

357 To construct the different *E. coli* expression strains, the appropriate plasmids (Table S3) were transformed  
358 into *E. coli* SoluBL21 by heat shock. SoluBL21 competent cells were prepared by TSS methods (37). Cells  
359 were plated in LB containing Cl, Ap and Km. When liquid cultures were required, preinocula with the  
360 appropriate antibiotics were grown in LB at 37°C until saturation. Once grown, the cultures were diluted to  
361 OD<sub>600</sub> 0.1 in fresh media and then grown at 37°C until OD<sub>600</sub> 0.4, at which point they were induced with  
362 IPTG 0.5 mM (Merck) and incubated at 28°C for 48 h. Cell were collected by centrifugation at 6,000 xg and  
363 4°C and the pellets were kept at -80°C.

### 364 **Carotenoid production and extraction**

365 For pigment production, strain cultures (250 to 1000 mL flasks) were performed according to respective *P.*  
366 *limnophila* and *E. coli* culture conditions. Cells were then harvested by centrifugation at 5,000 xg and 4°C,  
367 and the pellets were washed with phosphate buffer 1X (6.05 g L<sup>-1</sup> of Na<sub>2</sub>HPO<sub>4</sub>.12H<sub>2</sub>O and 1.0 g L<sup>-1</sup> of  
368 KH<sub>2</sub>PO<sub>4</sub>), frozen at -80°C, and lyophilized (VirTis BenchTop 2 K Freeze Dryer, SP Industries Inc.).  
369 Approximately 0.15 g of lyophilized biomass was sequentially extracted with ethanol, methanol and acetone  
370 (5 mL each) until no more color was extracted. Extraction was aided by vortex shaking for 1 min and  
371 sonication for 30 s. Extraction fractions were collected after centrifugation of samples (5,000 xg at 4°C), the  
372 solvent was evaporated to dryness under vacuum in a rotary evaporator (<30°C), and the dry extract was  
373 dissolved in acetone-ethanol (1:1) for chromatographic analysis. We performed all the operations under  
374 dimmed light to avoid isomerization and photo-degradation of carotenoid pigments.

## 375 **Carotenoid identification**

376 Carotenoid identification was based on the chromatographic and UV-visible spectroscopic (UV-visible and  
377 mass spectrometry) data obtained by HPLC coupled with a diode array detector (HPLC-DAD) and HPLC  
378 coupled with a mass spectrometer (HPLC-MS(APCI)). Data was compared with those of literature values  
379 (12, 18, 38–43). HPLC-DAD analysis was carried out using a Waters e2695 Alliance chromatograph fitted  
380 with a Waters 2998 photodiode array detector and controlled with Empower2 software (Waters  
381 Cromatografía, SA, Barcelona, Spain). The separation was performed in a reverse-phase C18 (20 mm x 4.6  
382 mm i.d., 3  $\mu\text{m}$ , Mediterranea SEA18; Teknokroma, Barcelona, Spain) fitted with a guard column of the same  
383 material (10 mm x 4.6 mm). The chromatographic method used was previously described in Delgado-Pelayo  
384 *et al.* (44), although we added formic acid (0.1 % final concentration) to the mobile phase. Briefly,  
385 carotenoid separation was carried out by a binary-gradient elution using an initial composition of 75 %  
386 acetone and 25 % deionized water (both containing 0.1 % formic acid), which was increased linearly to 95 %  
387 acetone in 10 min, held for 7 min, raised to 100 % in 3 min, and held for 10 min. Initial conditions were  
388 reached in 5 min. The temperature of the column was kept at 25°C and the sample compartment was  
389 refrigerated at 15°C. An injection volume of 10  $\mu\text{L}$  and a flow rate of 1  $\text{mL min}^{-1}$  were used. Detection was  
390 performed at 500 nm for major pigments and 370 nm for early precursors, and the online spectra were  
391 acquired in the 350–700 nm wavelength range. HPLC-MS(APCI) analysis was carried out with a Dionex  
392 Ultimate 3000RS U-HPLC (Thermo Fisher Scientific, Waltham, MA, USA) coupled in series with a diode  
393 array detector (DAD) and a micrOTOF-QII high resolution time-of-flight mass spectrometer (UHR-TOF)  
394 with qQ-TOF geometry (Bruker Daltonics, Bremen, Germany) and fitted with an APCI (atmospheric  
395 pressure chemical ionization) source. The chromatographic conditions were identical to those described for  
396 HPLC-DAD analysis. A flow-split of the eluent from the DAD detector was set up in order to allow a 0.4  
397  $\text{mL/min}$  flow rate directly into the mass spectrometer (connected in series after the DAD detector). The  
398 instrument control was performed using Bruker Daltonics Hystar 3.2 software and data evaluation was  
399 performed with the Bruker Daltonics DataAnalysis 4.0 software. The MS parameters were set as follows:  
400 positive mode; current corona, 4000 nA; source (vaporizer) temperature, 350°C; drying gas,  $\text{N}_2$ ; gas  
401 temperature, 250°C; gas flow, 4  $\text{L/min}$ ; nebulizer pressure, 60 psi; scan range of  $m/z$  50–1200.

402 For alkaline hydrolysis of carotenoid extracts from *P. limnophila* wild type, 1 mL of crude extract was  
403 evaporated to dryness under a nitrogen stream, and the residue was dissolved in 3 mL of 0.25 N NaOH  
404 (aqueous) and left to react for 24 h at room temperature (<25°C) in the dark. The mixture was acidified with  
405 formic acid and the pigments recovered with diethyl ether. The ether phase was collected, evaporated under  
406 nitrogen stream and dissolved in acetone-ethanol (1:1) for chromatographic analysis.

## 407 **Analysis of squalene by gas chromatography**

408 Lyophilized biomass pellet (0.1 g) was submitted to alkaline hydrolysis with 2 mL of 2 % (w/v) KOH-  
409 ethanol at 80°C for 15 min. Squalane (20  $\mu\text{L}$ ; stock solution 10.8  $\text{mg mL}^{-1}$ ) was added as internal standard.  
410 After cooling to room temperature, the mixture was diluted with 3 mL of distilled water and extracted with 1  
411 mL n-hexane. An aliquot of the upper hexane phase (0.5 mL) was transferred to a vial for GC-FID analysis.

412 Gas chromatography analysis were performed on an Agilent Technologies 7890A gas chromatograph  
413 (Agilent Technologies España, S.L., Madrid, Spain) fitted with a flame ionization detector, a split/splitless  
414 injector, and a 7683B series automatic liquid sampler. The chromatograph was fitted with a HP-5 capillary  
415 column (J&W Scientific; 30 m length; 0.32 mm i.d.; 0.25  $\mu\text{m}$  thickness). Helium was used as carrier gas with  
416 a constant linear flow of 1.75 mL  $\text{min}^{-1}$ . The injector and detector temperatures were 300°C and 325°C,  
417 respectively. The oven temperature started at 250°C and increased at a rate of 4°C  $\text{min}^{-1}$  to 270°C, where it  
418 was held for 3 min. The injection volume was 1  $\mu\text{L}$  at a split ratio of 1:20.

#### 419 **Phenotypic stress analysis**

420 For the physiological assays, preinocula of the *P. limnophila* wild type and mutants were grown in liquid  
421 media with antibiotics until saturation. Stress assays carried out in solid media (1% agar) used 5 to 10  $\mu\text{L}$   
422 drops from ten-fold serial dilution (cultures were adjusted to the same  $\text{OD}_{600}$ ). For the oxidative stress assays,  
423 cells were grown in paraquat-supplemented solid medium to a final media concentration of 2  $\mu\text{M}$ . To  
424 evaluate the resistance to osmotic stress, we grew cells on plates supplemented with 15 mM sodium chloride.  
425 For desiccation assays, cells were placed on a nitrocellulose membrane and left to air-dry in a laminar flow  
426 cabinet for 1 h (control was left for 5 min to allow the drops to dry). Then, the membranes were placed onto  
427 solid medium and incubated. For the temperature assays, saturated cultures were further diluted to  $\text{OD}_{600}$   
428 0.03 and grown at different temperatures (16, 22, 28, 32, 36, 38 and 40°C) until cultures reached stationary  
429 phase.  $\text{OD}_{600}$  measurements of the cultures were taken regularly along the growth curve. A temperature stress  
430 assay was also performed by subjecting each strain to three freeze-thaw cycles. Aliquots of cell suspensions  
431 grown at 28°C were frozen at -20°C. After 24, 48, and 72 h, cells were thawed, and the viability was  
432 determined in solid media by plating 10  $\mu\text{L}$  drops from ten-fold serial dilution and compared with the  
433 viability of non-treated cells. The remaining sample volume was re-frozen for subsequent freeze-thaw cycles.  
434 Statistical analysis was performed using IBM SPSS version 25; SPSS Science (Chicago, IL, USA). Student's  
435 t-test was used to compare mean growth rates. A significance level of  $P < 0.05$  for the 95% confidence  
436 interval was chosen to define the statistical significance.

#### 437 **Phylogeny**

438 To infer the evolution of carotenoid amino oxidases, we searched for homologous sequences to amino  
439 oxidases such as HpnE, CrtN, and CrtI. We performed PHMMER searches (45) with an e-value threshold of  
440  $1e^{-5}$ , against a local database containing NCBI proteomes of those organisms described in GTDB (version  
441 120 (46)). We combined the resulting target sequences (~14,000) into a single dataset, aligned them using  
442 MAFFT(47), and trimmed gap positions using trimAL (48) and some other non-informative regions  
443 manually. With this alignment, we then performed a guide tree using Fasttree (default parameters) (49), and  
444 selected the subfamilies of interest according to the presence of characterized enzymes. For each subfamily,  
445 we removed non-redundant sequence for taxonomic classes by applying different cut-offs depending on the  
446 number of sequences (20 sequences, 95 % identity; up to 250 sequences, 55 %). These individual reduced  
447 subfamilies were again combined to performed the final phylogenies of carotenoid/squalene amino oxidases  
448 and those for CrtN/P. We aligned these datasets using MAFFT-linsi, trimmed gap positions and removed



449 spurious sequences. These final alignments were used for phylogenetic reconstructions using IQ-TREE (50).  
450 We obtained branch supports with the ultrafast bootstrap (51), and the evolutionary models of each set of  
451 sequences were automatically selected using ModelFinder (52) and chosen according to BIC criterion. All  
452 trees were visualized and annotated using iTOL (53).

453 For the phylogenetic profiles mapped onto the CrtN/P phylogeny, we made use of a previously defined  
454 dataset for HpnCDE, CrtB/M, Sqs and Shc subfamilies (4).

#### 455 **Genome context**

456 We defined the genome context as the arrangement of neighboring genes relative to the gene of interest. To  
457 analyze the genome contexts of genes containing the amino oxidase domain (PF01593), we extracted the  
458 genomic sequence of the genes 10 Kb upstream and downstream. We extracted the coding DNA sequence  
459 from these genomic fragments using PRODIGAL (54), annotated the coding proteins using the PFAM  
460 database (55) running HMMSCAN (45), and parsed the output to keep the longest coverage and best e-value  
461 in order to minimize the effect of overlapping domains. To identify the genes that are in the genome context  
462 of *crtN* (Data S2), we took all the coding genes containing the amino oxidase and SQS PSY domains, and  
463 searched against a homemade database of the different Trans IPPS HH and amino oxidases subfamilies using  
464 PHMMER with  $1e^{-20}$  as the e-value threshold.

465

#### 466 **References**

- 467 1. Rodriguez-Concepcion M, Avalos J, Bonet ML, Boronat A, Gomez-Gomez L, Hornero-Mendez D,  
468 Limon MC, Meléndez-Martínez AJ, Olmedilla-Alonso B, Palou A, Ribot J, Rodrigo MJ, Zacarias L,  
469 Zhu C. 2018. A global perspective on carotenoids: Metabolism, biotechnology, and benefits for  
470 nutrition and health. *Progress in Lipid Research* 70:62–93.
- 471 2. Avalos M, Garbeva P, Vader L, van Wezel GP, Dickschat JS, Ulanova D. 2021. Biosynthesis,  
472 evolution and ecology of microbial terpenoids. *Nat Prod Rep* <https://doi.org/10.1039/D1NP00047K>.
- 473 3. Ourisson G, Nakatani Y. 1994. The terpenoid theory of the origin of cellular life: the evolution of  
474 terpenoids to cholesterol. *Chemistry & Biology* 1:11–23.
- 475 4. Santana-Molina C, Rivas-Marin E, Rojas AM, Devos DP. 2020. Origin and evolution of polycyclic  
476 triterpene synthesis. *Molecular Biology and Evolution* <https://doi.org/10.1093/molbev/msaa054>.
- 477 5. Furubayashi M, Li L, Katabami A, Saito K, Umeno D. 2014. Construction of carotenoid biosynthetic  
478 pathways using squalene synthase. *FEBS Letters* 588:436–442.
- 479 6. Rivas-Marin E, Stettner S, Gottshall EY, Santana-Molina C, Helling M, Basile F, Ward NL, Devos DP.  
480 2019. Essentiality of sterol synthesis genes in the planctomycete bacterium *Gemmata obscuriglobus*.  
481 *Nat Commun* 10:2916–2916.
- 482 7. Rizk S, Henke P, Santana-Molina C, Martens G, Gnädig M, Nguyen NA, Devos DP, Neumann-Schaal  
483 M, Saenz JP. 2021. Functional diversity of isoprenoid lipids in *Methylobacterium extorquens* PA1.  
484 *Molecular Microbiology* n/a.
- 485 8. Kumar SV, Taylor G, Hasim S, Collier CP, Farmer AT, Campagna SR, Bible AN, Doktycz MJ,  
486 Morrell-Falvey J. 2019. Loss of carotenoids from membranes of *Pantoea* sp. YR343 results in altered  
487 lipid composition and changes in membrane biophysical properties. *Biochimica et Biophysica Acta*  
488 (BBA) - Biomembranes 1861:1338–1345.
- 489 9. Gruszecki WI, Strzałka K. 2005. Carotenoids as modulators of lipid membrane physical properties.  
490 *Biochimica et Biophysica Acta (BBA) - Molecular Basis of Disease* 1740:108–115.
- 491 10. Seel W, Baust D, Sons D, Albers M, Etbach L, Fuss J, Lipski A. 2020. Carotenoids are used as  
492 regulators for membrane fluidity by *Staphylococcus xylosus*. *Scientific Reports* 10:330.

- 493 11. Bradley AS, Swanson PK, Muller EEL, Bringel F, Carroll SM, Pearson A, Vuilleumier S, Marx CJ.  
494 2017. Hopanoid-free *Methylobacterium extorquens* DM4 overproduces carotenoids and has widespread  
495 growth impairment. *PLOS ONE* 12:e0173323.
- 496 12. Kim SH, Lee PC. 2012. Functional expression and extension of staphylococcal staphyloxanthin  
497 biosynthetic pathway in *Escherichia coli*. *J Biol Chem*, 2012/04/25 ed. 287:21575–21583.
- 498 13. Kleinig H, Schmitt R, Meister W, Englert G, Thommen H. 1979. New C30- carotenoid acid glucosyl  
499 esters from *Pseudomonas rhodos*. *Z Naturforsch* 34c:181–185.
- 500 14. Kleinig H, Schmitt R. 1982. On the Biosynthesis of C<sub>30</sub> Carotenoid Acid Glucosyl Esters in  
501 *Pseudomonas rhodos*. Analysis of car-Mutants. *Zeitschrift für Naturforschung C* 37:758–760.
- 502 15. Shindo K, Kikuta K, Suzuki A, Katsuta A, Kasai H, Yasumoto-Hirose M, Matsuo Y, Misawa N,  
503 Takaichi S. 2007. Rare carotenoids, (3R)-saproxanthin and (3R,2'S)-myxol, isolated from novel marine  
504 bacteria (Flavobacteriaceae) and their antioxidative activities. *Applied Microbiology and*  
505 *Biotechnology* 74:1350–1357.
- 506 16. Shindo K, Asagi E, Sano A, Hotta E, Minemura N, Mikami K, Tamesada E, Misawa N, Maoka T.  
507 2008. Diapolycopenedioic Acid Xylosyl Esters A, B, and C, Novel Antioxidative Glyco-C30-  
508 carotenoid Acids Produced by a New Marine Bacterium *Rubritalea squalenifaciens*. *The Journal of*  
509 *Antibiotics* 61:185–191.
- 510 17. Shindo K, Endo M, Miyake Y, Wakasugi K, Morrill D, Bramley PM, Fraser PD, Kasai H, Misawa N.  
511 2008. Methyl Glucosyl-3,4-dehydro-apo-8'-lycopenoate, a Novel Antioxidative Glyco-C30-carotenoid  
512 Acid Produced by a Marine Bacterium *Planococcus maritimus*. *The Journal of Antibiotics* 61:729–735.
- 513 18. Steiger S, Perez-Fons L, Fraser PD, Sandmann G. 2012. Biosynthesis of a novel C30 carotenoid in  
514 *Bacillus firmus* isolates. *Journal of Applied Microbiology* 113:888–895.
- 515 19. Kallscheuer N, Moreira C, Airs R, Llewellyn CA, Wiegand S, Jogler C, Lage OM. 2019. Pink- and  
516 orange-pigmented Planctomycetes produce saproxanthin-type carotenoids including a rare C45  
517 carotenoid. *Environmental Microbiology Reports* 11:741–748.
- 518 20. Mijts BN, Lee PC, Schmidt-Dannert C. 2005. Identification of a Carotenoid Oxygenase Synthesizing  
519 Acyclic Xanthophylls: Combinatorial Biosynthesis and Directed Evolution. *Chemistry & Biology*  
520 12:453–460.
- 521 21. Klassen JL. 2010. Phylogenetic and evolutionary patterns in microbial carotenoid biosynthesis are  
522 revealed by comparative genomics. *PLoS One* 5:e11257–e11257.
- 523 22. Yang Y, Yatsunami R, Ando A, Miyoko N, Fukui T, Takaichi S, Nakamura S. 2015. Complete  
524 biosynthetic pathway of the C50 carotenoid bacterioruberin from lycopene in the extremely halophilic  
525 archaeon *Haloarcula japonica*. *J Bacteriol*, 2015/02/23 ed. 197:1614–1623.
- 526 23. Umeno D, Tobias AV, Arnold FH. 2002. Evolution of the C30 carotenoid synthase CrtM for function  
527 in a C40 pathway. *J Bacteriol* 184:6690–6699.
- 528 24. Gilmore SF, Yao AI, Tietel Z, Kind T, Facciotti MT, Parikh AN. 2013. Role of squalene in the  
529 organization of monolayers derived from lipid extracts of *Halobacterium salinarum*. *Langmuir*,  
530 2013/06/10 ed. 29:7922–7930.
- 531 25. Gnamusch E, Kalas C, Hrastnik C, Paltauf F, Daum G. 1992. Transport of phospholipids between  
532 subcellular membranes of wild-type yeast cells and of the phosphatidylinositol transfer protein-  
533 deficient strain *Saccharomyces cerevisiae* sec 14. *Biochimica et Biophysica Acta (BBA) -*  
534 *Biomembranes* 1111:120–126.
- 535 26. Nathan JA. 2020. Squalene and cholesterol in the balance at the ER membrane. *Proc Natl Acad Sci U S*  
536 *A*, 2020/04/01 ed. 117:8228–8230.
- 537 27. Summons RE, Welander PV, Gold DA. 2021. Lipid biomarkers: molecular tools for illuminating the  
538 history of microbial life. *Nature Reviews Microbiology* <https://doi.org/10.1038/s41579-021-00636-2>.
- 539 28. Dyson MR, Shadbolt SP, Vincent KJ, Perera RL, McCafferty J. 2004. Production of soluble  
540 mammalian proteins in *Escherichia coli*: identification of protein features that correlate with successful  
541 expression. *BMC Biotechnology* 4:32.
- 542 29. Studier FW. 2005. Protein production by auto-induction in high-density shaking cultures. *Protein*  
543 *Expression and Purification* 41:207–234.
- 544 30. Rivas-Marín E, Canosa I, Santero E, Devos DP. 2016. Development of Genetic Tools for the  
545 Manipulation of the Planctomycetes. *Frontiers in Microbiology* 7:914.

- 546 31. Hoang TT, Karkhoff-Schweizer RR, Kutchma AJ, Schweizer HP. 1998. A broad-host-range Flp-FRT  
547 recombination system for site-specific excision of chromosomally-located DNA sequences: application  
548 for isolation of unmarked *Pseudomonas aeruginosa* mutants. *Gene* 212:77–86.
- 549 32. Herrero M, de Lorenzo V, Timmis K. 1990. Transposon vectors containing non-antibiotic selection  
550 markers for cloning and stable chromosomal insertion of foreign DNA in Gram-negative bacteria.
- 551 33. Kovach ME, Elzer PH, Hill DS, Robertson GT, Farris MA, Roop RM 2nd, Peterson KM. 1995. Four  
552 new derivatives of the broad-host-range cloning vector pBBR1MCS, carrying different antibiotic-  
553 resistance cassettes. *Gene* 166:175–176.
- 554 34. Bolivar F, Rodriguez RL, Greene PJ, Betlach MC, Heyneker HL, Boyer HW, Crosa JH, Falkow S.  
555 1977. Construction and characterization of new cloning vehicle. II. A multipurpose cloning system.  
556 *Gene* 2:95–113.
- 557 35. Silva-Rocha R, Martínez-García E, Calles B, Chavarría M, Arce-Rodríguez A, de Las Heras A, Páez-  
558 Espino AD, Durante-Rodríguez G, Kim J, Nikel PI, Platero R, de Lorenzo V. 2013. The Standard  
559 European Vector Architecture (SEVA): a coherent platform for the analysis and deployment of  
560 complex prokaryotic phenotypes. *Nucleic Acids Res*, 2012/11/23 ed. 41:D666–D675.
- 561 36. Gallagher LA, Manoil C. 2001. *Pseudomonas aeruginosa* PAO1 Kills *Caenorhabditis*  
562 *elegans* by Cyanide Poisoning. *J Bacteriol* 183:6207.
- 563 37. Chung CT, Niemela SL, Miller RH. 1989. One-step preparation of competent *Escherichia coli*:  
564 transformation and storage of bacterial cells in the same solution. *Proc Natl Acad Sci U S A* 86:2172–  
565 2175.
- 566 38. Britton G. 1985. General carotenoid methods, p. 113–149. *In* *Methods in Enzymology*. Academic  
567 Press.
- 568 39. Lee PC, Momen AZR, Mijts BN, Schmidt-Dannert C. 2003. Biosynthesis of Structurally Novel  
569 Carotenoids in *Escherichia coli*. *Chemistry & Biology* 10:453–462.
- 570 40. Tao L, Schenzle A, Odom JM, Cheng Q. 2005. Novel carotenoid oxidase involved in biosynthesis of  
571 4,4'-diapolycopene dialdehyde. *Appl Environ Microbiol* 71:3294–3301.
- 572 41. Britton G, Liaaen-Jensen S, Pfender H. 2008. Special Molecules, Special properties. *In*: *Carotenoids*;  
573 *Natural Functions*.
- 574 42. Garrido-Fernández J, Maldonado-Barragán A, Caballero-Guerrero B, Hornero-Méndez D, Ruiz-Barba  
575 JL. 2010. Carotenoid production in *Lactobacillus plantarum*. *International Journal of Food*  
576 *Microbiology* 140:34–39.
- 577 43. Osawa A, Iki K, Sandmann G, Shindo K. 2013. Isolation and Identification of 4, 4'-Diapolycopene-  
578 4,4'-dioic Acid Produced by *Bacillus firmus* GB1 and its Singlet Oxygen Quenching Activity. *Journal*  
579 *of Oleo Science* 62:955–960.
- 580 44. Delgado-Pelayo R, Hornero-Méndez D. 2012. Identification and Quantitative Analysis of Carotenoids  
581 and Their Esters from Sarsaparilla (*Smilax aspera* L.) Berries. *J Agric Food Chem* 60:8225–8232.
- 582 45. Potter SC, Luciani A, Eddy SR, Park Y, Lopez R, Finn RD. 2018. HMMER web server: 2018 update.  
583 *Nucleic Acids Res* 46:W200–W204.
- 584 46. Parks DH, Chuvochina M, Waite DW, Rinke C, Skarshewski A, Chaumeil P-A, Hugenholtz P. 2018. A  
585 standardized bacterial taxonomy based on genome phylogeny substantially revises the tree of life.  
586 *Nature Biotechnology* 36:996–1004.
- 587 47. Katoh K, Misawa K, Kuma K, Miyata T. 2002. MAFFT: a novel method for rapid multiple sequence  
588 alignment based on fast Fourier transform. *Nucleic Acids Res* 30:3059–3066.
- 589 48. Capella-Gutiérrez S, Silla-Martínez JM, Gabaldón T. 2009. trimAl: a tool for automated alignment  
590 trimming in large-scale phylogenetic analyses. *Bioinformatics*, 2009/06/08 ed. 25:1972–1973.
- 591 49. Price MN, Dehal PS, Arkin AP. 2009. FastTree: Computing Large Minimum Evolution Trees with  
592 Profiles instead of a Distance Matrix. *Molecular Biology and Evolution* 26:1641–1650.
- 593 50. Minh BQ, Schmidt HA, Chernomor O, Schrempf D, Woodhams MD, von Haeseler A, Lanfear R.  
594 2020. IQ-TREE 2: New Models and Efficient Methods for Phylogenetic Inference in the Genomic Era.  
595 *Molecular Biology and Evolution* 37:1530–1534.
- 596 51. Hoang DT, Chernomor O, von Haeseler A, Minh BQ, Vinh LS. 2018. UFBoot2: Improving the  
597 Ultrafast Bootstrap Approximation. *Mol Biol Evol* 35:518–522.
- 598 52. Kalyaanamoorthy S, Minh BQ, Wong TKF, von Haeseler A, Jermini LS. 2017. ModelFinder: fast  
599 model selection for accurate phylogenetic estimates. *Nature Methods* 14:587–589.

- 600 53. Letunic I, Bork P. 2019. Interactive Tree Of Life (iTOL) v4: recent updates and new developments.  
601 Nucleic Acids Res 47:W256–W259.  
602 54. Hyatt D, Chen G-L, LoCascio PF, Land ML, Larimer FW, Hauser LJ. 2010. Prodigal: prokaryotic gene  
603 recognition and translation initiation site identification. BMC Bioinformatics 11:119.  
604 55. Finn RD, Clements J, Eddy SR. 2011. HMMER web server: interactive sequence similarity searching.  
605 Nucleic Acids Res, 2011/05/18 ed. 39:W29–W37.  
606  
607

## 608 **Acknowledgments**

609 **Funding:** This work was supported by the Spanish Ministry of Economy and Competitiveness (Grant No.  
610 BFU2016-78326-Pand and MDM-2016-0687) and the “Moore-Simons Project on the Origin of the  
611 Eukaryotic Cell” (Grant No. 9733). **Author contributions:** C.S.M, E.R.M and D.P.D designed the study.  
612 C.S.M performed *in silico* analysis. V.H. and E.R.M constructed the mutants and performed the  
613 physiological assays. D.H. chemically characterized *P. limnophila* triterpenoids. All authors analyzed and  
614 interpreted data, and contributed to writing the manuscript. **Competing interests:** The authors declare that  
615 they have no competing interests. **Data and materials availability:** All data needed to evaluate the  
616 conclusions in the paper are present in the paper and/or the Supplementary Materials.

617 **Main figures**

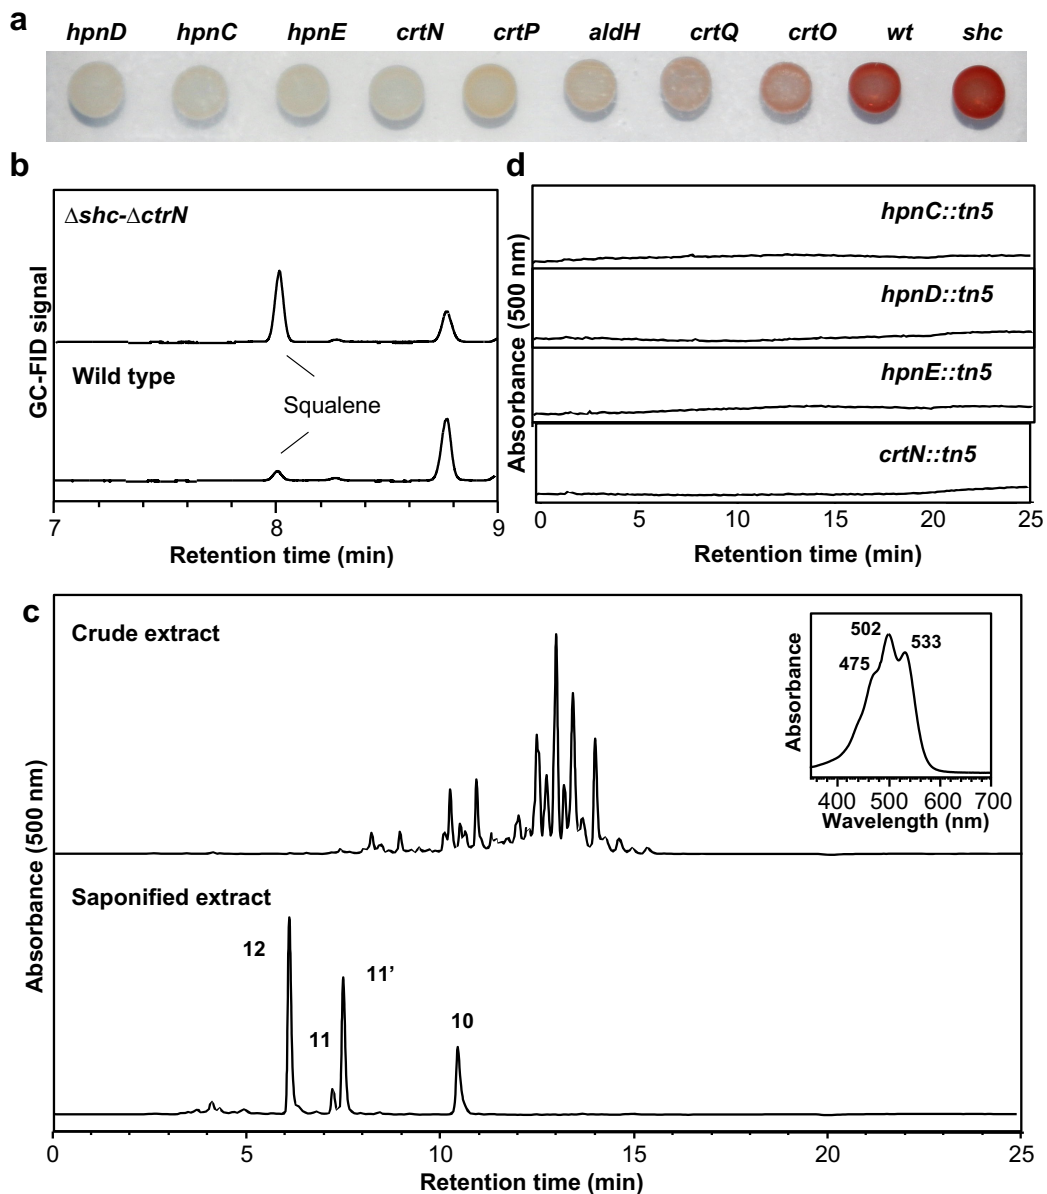

618  
619 **Figure 1: *P. limnophila* carotenoids analysis.** a) Culture drops of wild type and various mutants lacking the  
620 indicated genes, b) GC-FID analysis of squalene in wild type and  $\Delta crtN-\Delta shc$  mutant strains, c) HPLC  
621 separation of carotenoid pigments present in crude and saponified (alkaline hydrolysis) extracts obtained  
622 from wild type strain and total UV-visible spectrum for the crude extract. Peak numbers are in accordance  
623 with the chromatograms in Figure 2 and the pathway scheme (Fig. 3): 4,4'-diapolycopenoic acid (10); 4,4'-  
624 diapolycopen-4'-al-4-oic acid (11 & 11'); 4,4'-diapolycopen-4,4'-dioic acid (12). d) HPLC chromatograms  
625 corresponding to the carotenoid analysis for transposon-inserted mutants (*hpnC*, *hpnD*, *hpnE* and *crtN*).  
626 HPLC detection wavelength at 500 nm.

627  
628



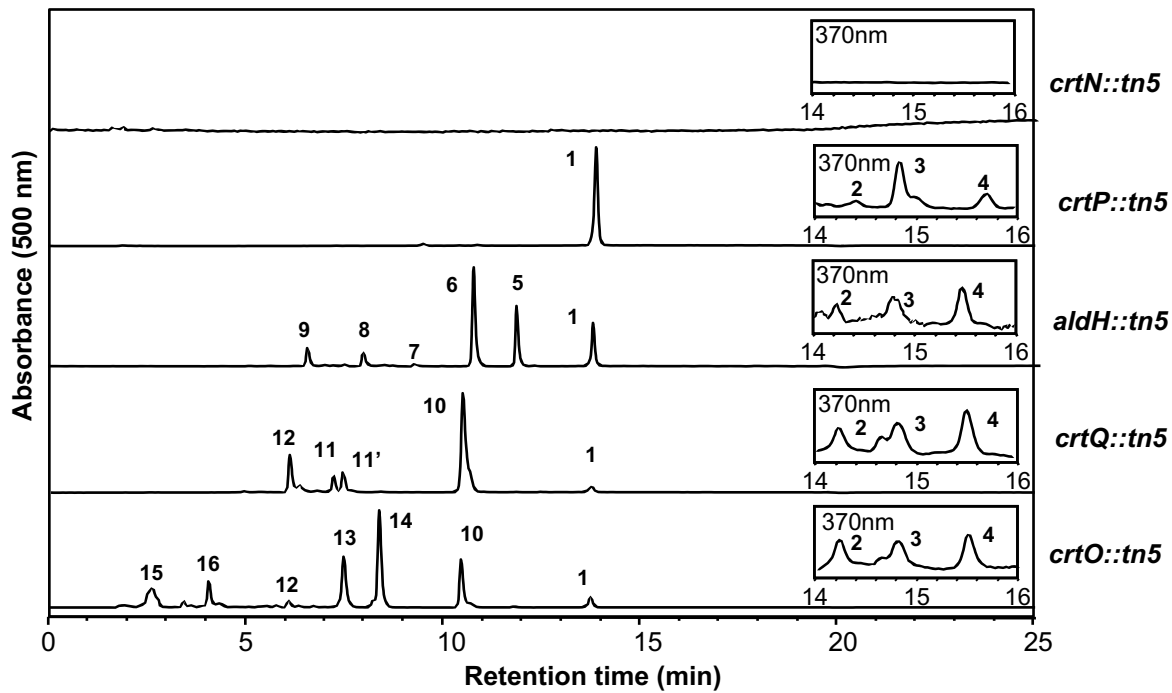

629

630 **Figure 2: HPLC chromatograms corresponding to the analyses of *P. limnophila* carotenoid mutants.**

631 Detection wavelengths at 370 and 500 nm. Peaks: 4,4'-diapolycopene (1); 4,4'-diaponeurosporene (2); 4,4'-  
632 diapo- $\zeta$ -carotene (3); 4,4'-diapophytofluene (4); 4,4'-diapolycopene-4-al (5); 4,4'-diapolycopene-4-ol (6);  
633 4,4'-diapolycopene dial (7); 4,4'-diapolycopene-4-ol-4'-al (8); 4,4'-diapolycopene-4,4'-diol (9); 4,4'-  
634 diapolycopenoic acid (10); 4,4'-diapolycopene-4'-al-4-oic acid (11 & 11'); 4,4'-diapolycopene-4,4'-dioic acid  
635 (12); glycosyl esters of 4,4'-diapolycopenoic acid (13 & 14); and glycosyl esters of 4,4'-diapolycopene-4,4'-  
636 dioic acid (15 & 16).

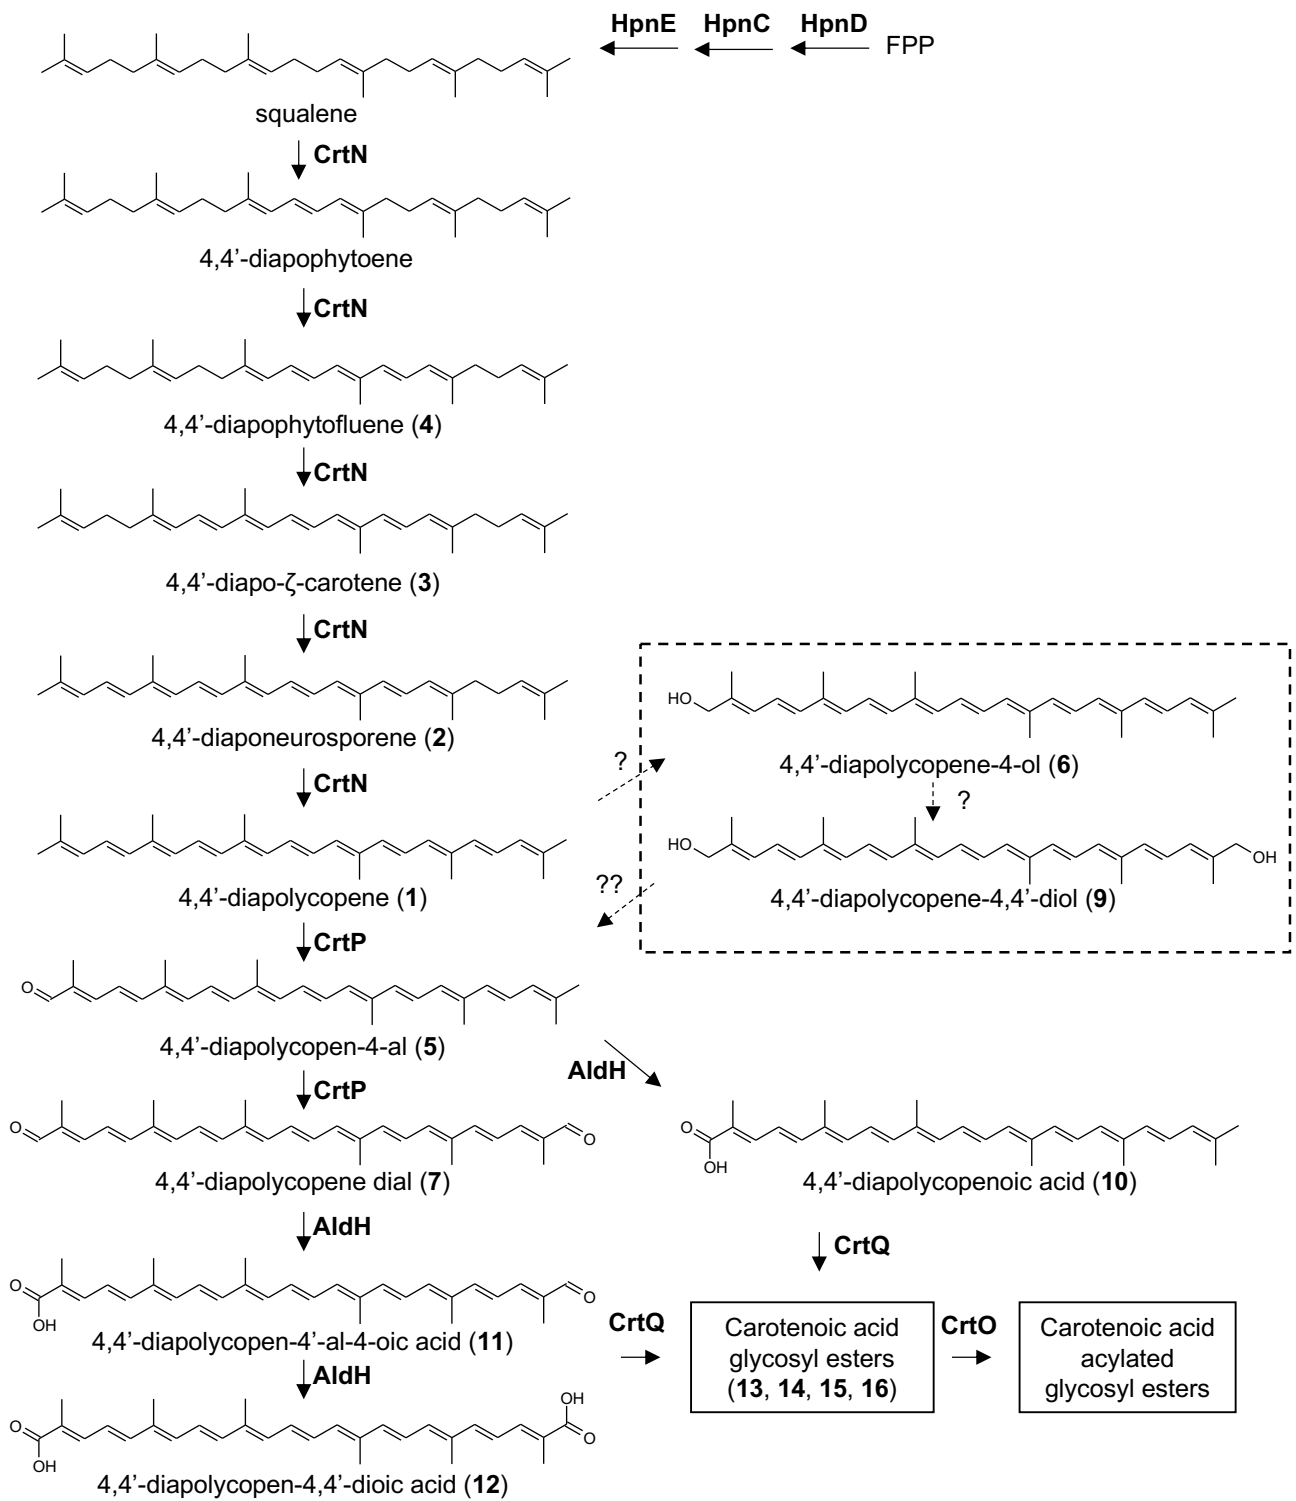

637

638

639 **Figure 3: Proposed pathway for carotenoid biosynthesis in *P. limnophila*.** Compound numbers are in  
 640 accordance with peak numbers in Figure 2.

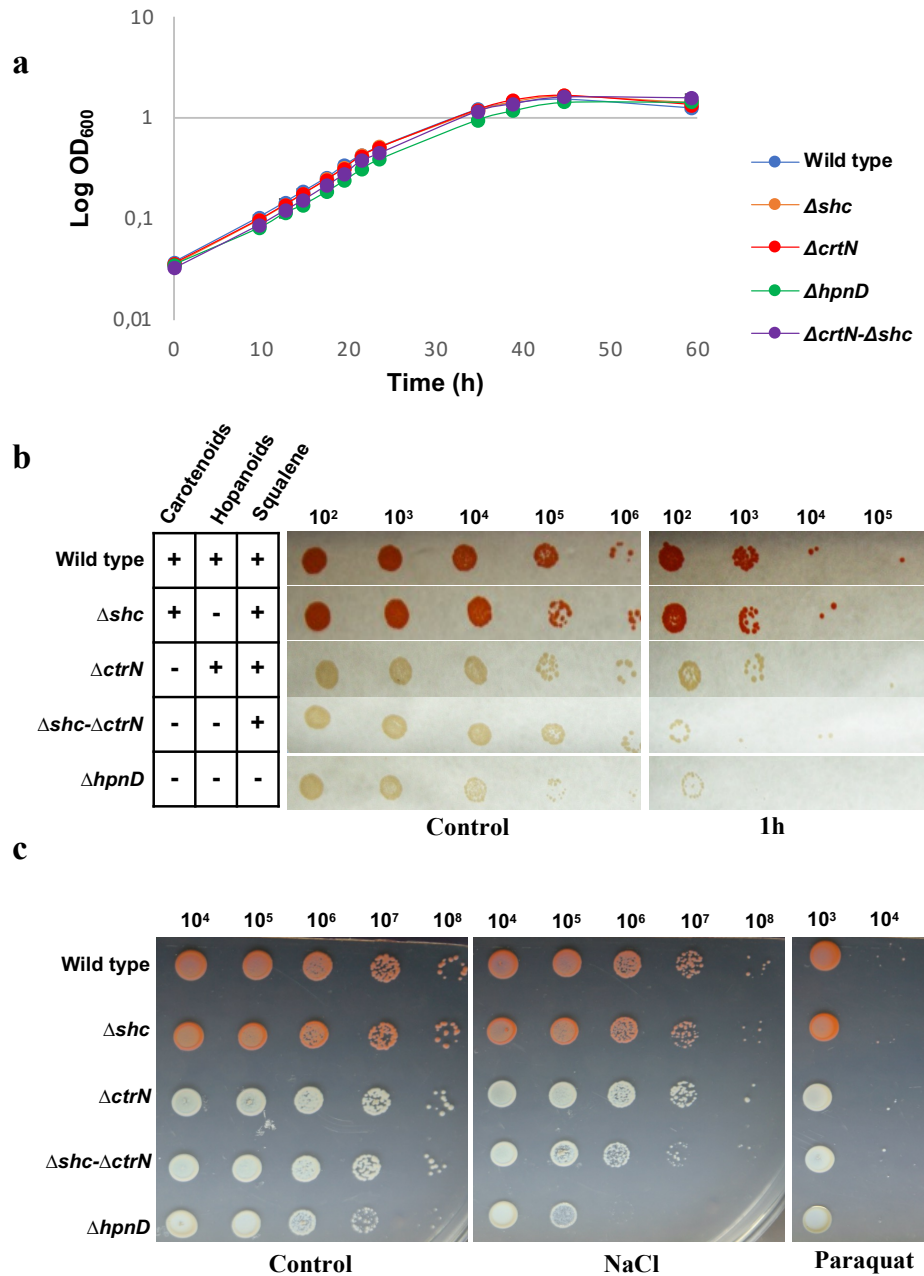

641  
 642 **Figure 4: Phenotypic assays of selected *P. limnophila* mutants.** a) growth curves, b) growth under  
 643 desiccation stress (1h), and c) growth in plates (1 % agar) under osmotic (15 mM NaCl) and oxidative stress  
 644 (2  $\mu$ M paraquat).

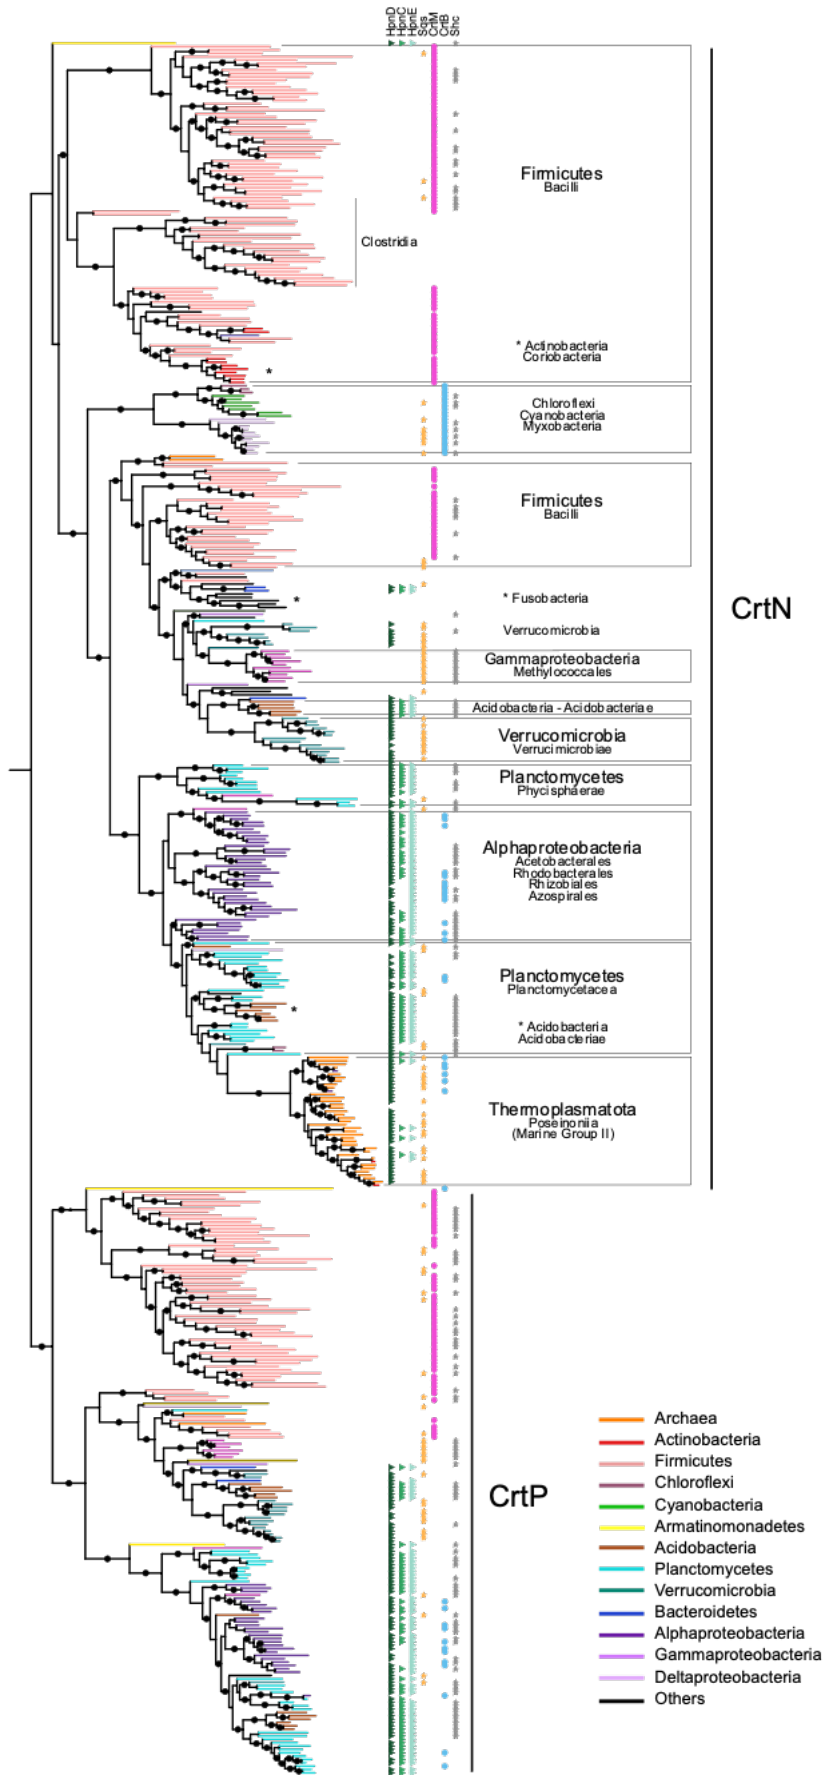

646 **Figure 5: Phylogeny of C30-specific amino oxidases CrtN and CrtP and co-occurrence with genes of**  
 647 **interest.** The dataset was reduced by phyla by progressive redundancy. Branches are colored according to  
 648 the prokaryotic phyla. Black circles indicate bootstraps >90 %. Phyla and classes are indicated. The  
 649 phylogenetic profile includes the presence of HpnCDE (green triangles), Sqs (orange star), CrtM (pink  
 650 circle), CrtB (blue circle) and Shc (gray star). More information for the taxonomic profile is shown in Data  
 651 S1.  
 652

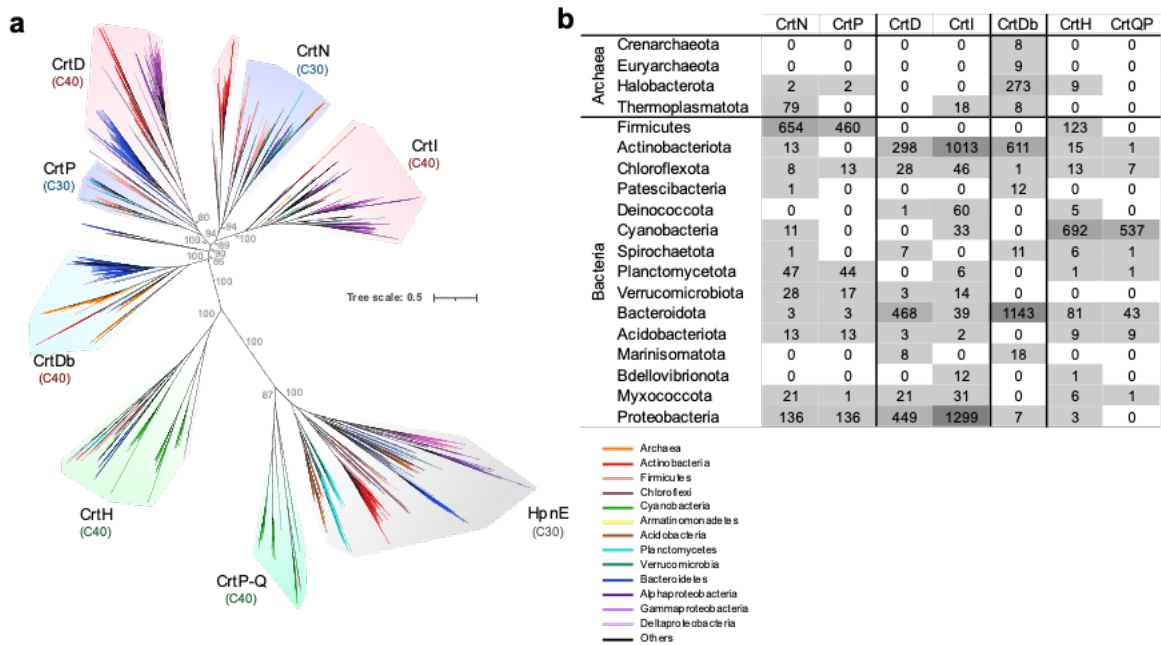

653  
 654 **Figure 6: Phylogeny and taxonomic distribution of carotenoid amino oxidases.** a) Maximum-likelihood  
 655 reconstruction of selected non-redundant subfamilies of carotenoid amino oxidases. The subfamilies are  
 656 highlighted and annotated according to the presence of characterized proteins. Branches are colored by  
 657 taxonomic phyla. b) Taxonomic composition of the different subfamilies. Numbers indicates the number of  
 658 sequences in each phylum. More information is shown in Data S1.



## Supplementary Materials for

### **The ‘squalene route’ to carotenoid biosynthesis is widespread in *Bacteria***

Carlos Santana-Molina\*<sup>1</sup>, Valentina Henriques<sup>1</sup>, Damaso Hornero-Méndez<sup>2</sup>,  
Damien P. Devos\*<sup>1</sup>, Elena Rivas-Marin\*<sup>1</sup>

\*Corresponding author. Email: CSM (csantmol@gmail.com), DPD (damienpdevos@gmail.com) and ERM (erivmar@upo.es).

#### **This PDF file includes:**

Figs. S1 to S7  
Tables S1 to S3

#### **Other Supplementary Materials for this manuscript include the following:**

Data S1 to S2

Fig. S1.

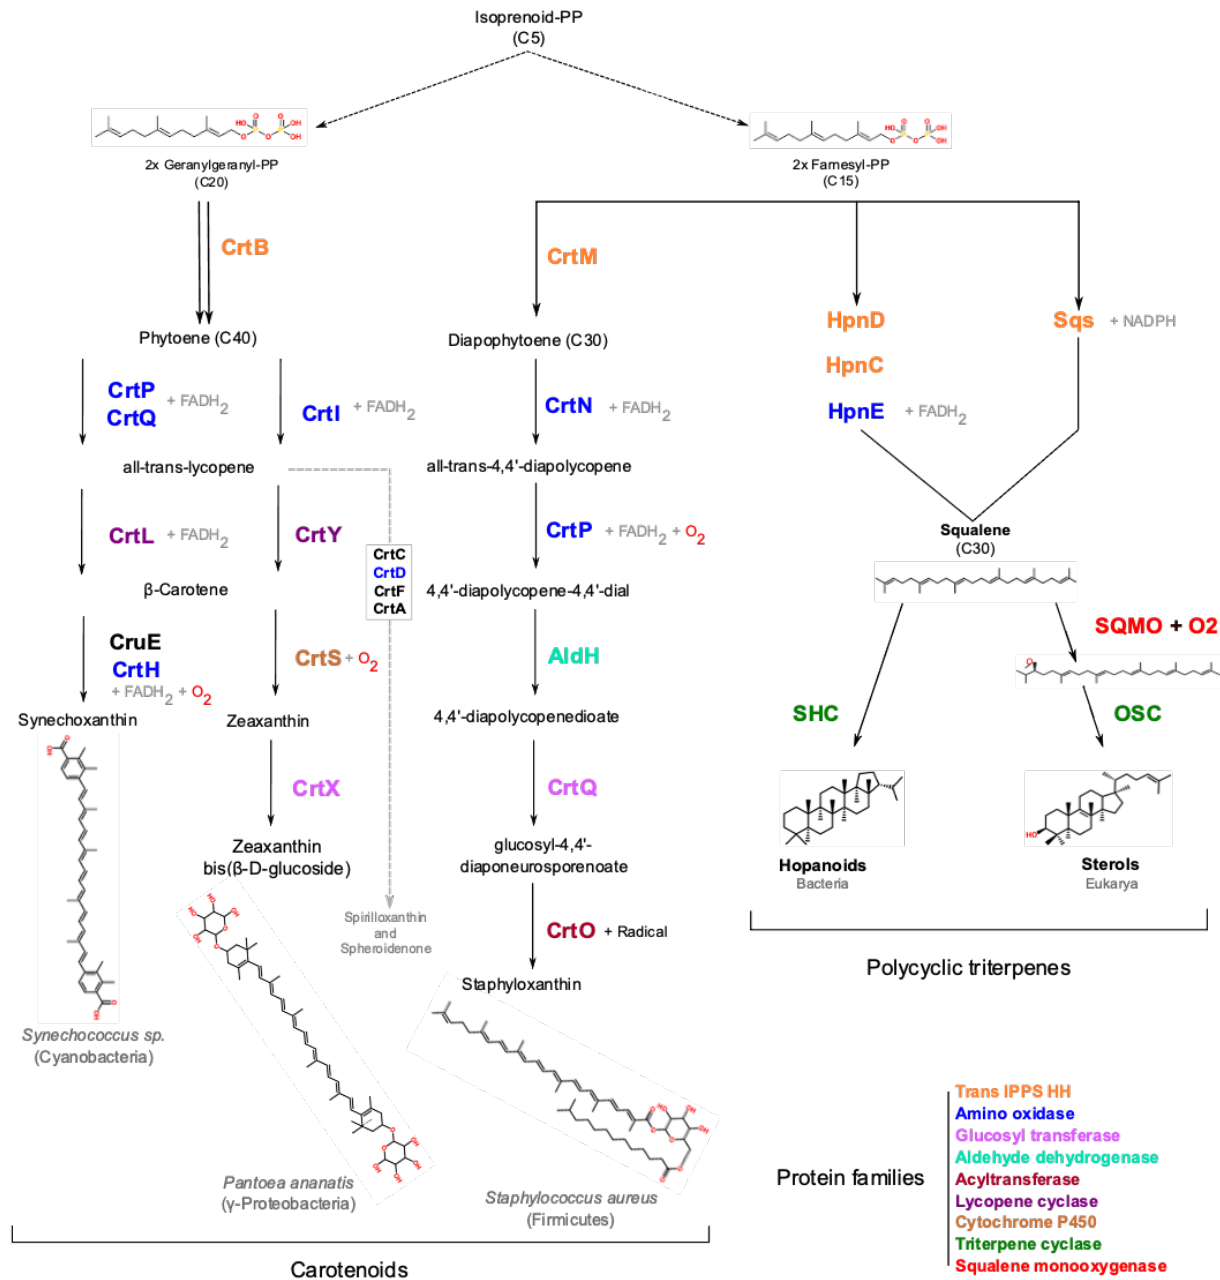

**Schematic of the canonical polycyclic and linear terpenoid biosynthesis pathways.** Biosynthetic pathways of polycyclic triterpenes and carotenoids (C30 and C40), starting from farnesyl-PP or geranylgeranyl-PP. Homologous enzymes are shown in the same color to illustrate the evolutionary relationship and homologies between the pathways. Note that the pathways shown are representative; alternative routes are possible.

Fig. S2.

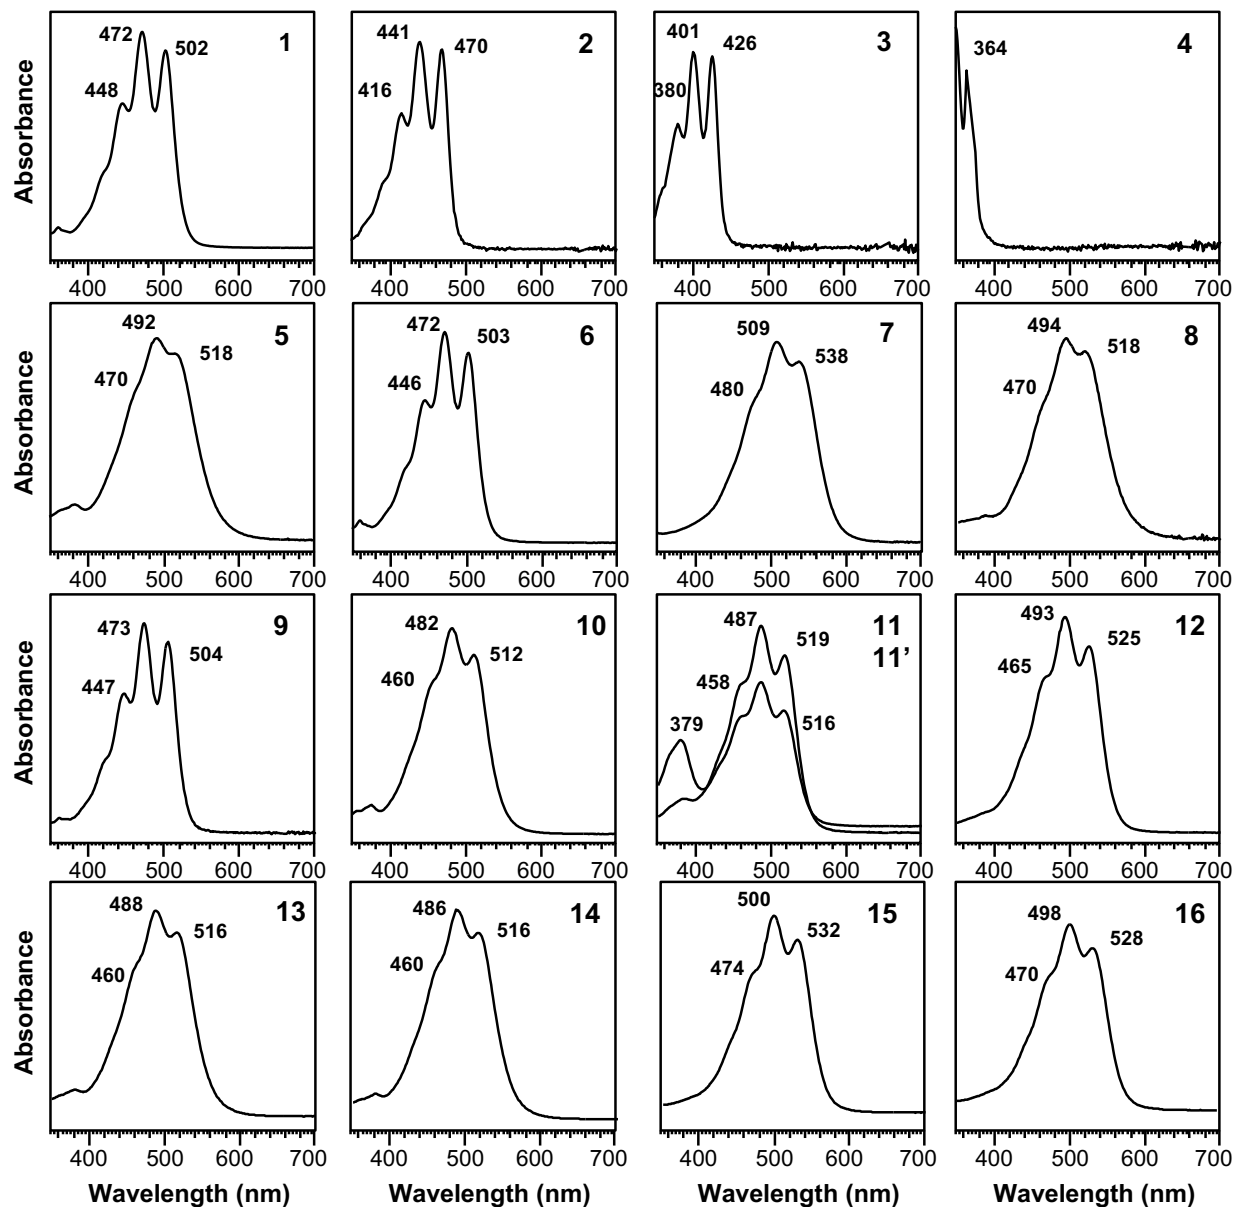

UV-visible spectra of the carotenoids from *P. limnophila* mutants. Spectrum numbers are in accordance with chromatogram peaks in Figure 2 and compounds in the pathway scheme (Fig. 3): 4,4'-diapolycopene (1); 4,4'-diaponeurosporene (2); 4,4'-diapo- $\zeta$ -carotene (3); 4,4'-diapophytofluene (4); 4,4'-diapolycopene-4-al (5); 4,4'-diapolycopene-4-ol (6); 4,4'-diapolycopene dial (7); 4,4'-diapolycopene-4-ol-4'-al (8); 4,4'-diapolycopene-4,4'-diol (9); 4,4'-diapolycopenoic acid (10); 4,4'-diapolycopene-4'-al-4-oic acid (11 & 11'); 4,4'-diapolycopene-4,4'-dioic acid (12); glycosyl esters of 4,4'-diapolycopenoic acid (13 & 14); and glycosyl esters of 4,4'-diapolycopene-4,4'-dioic acid (15 & 16).

**Fig. S3.**

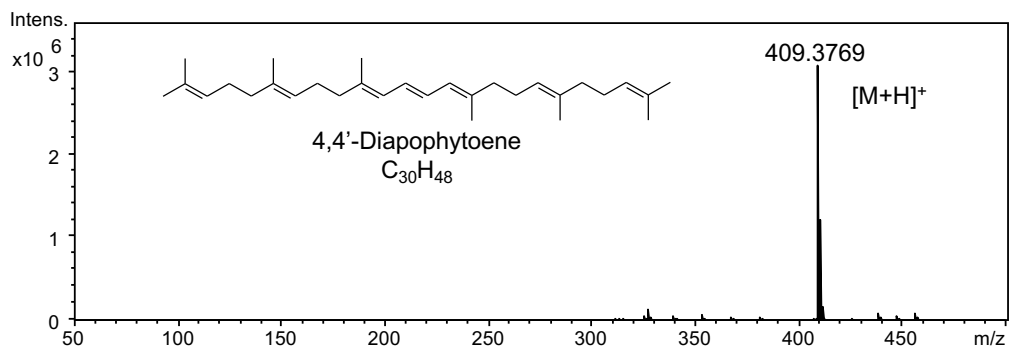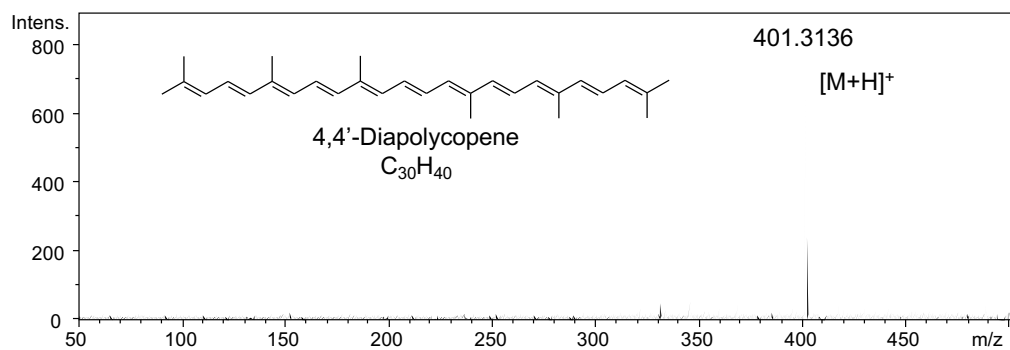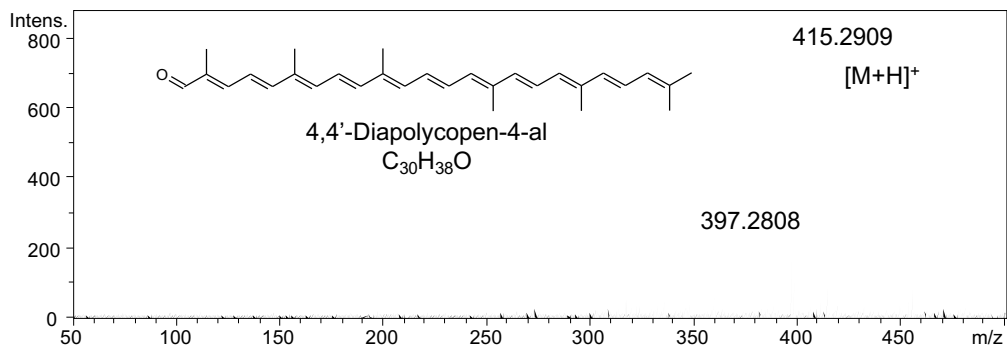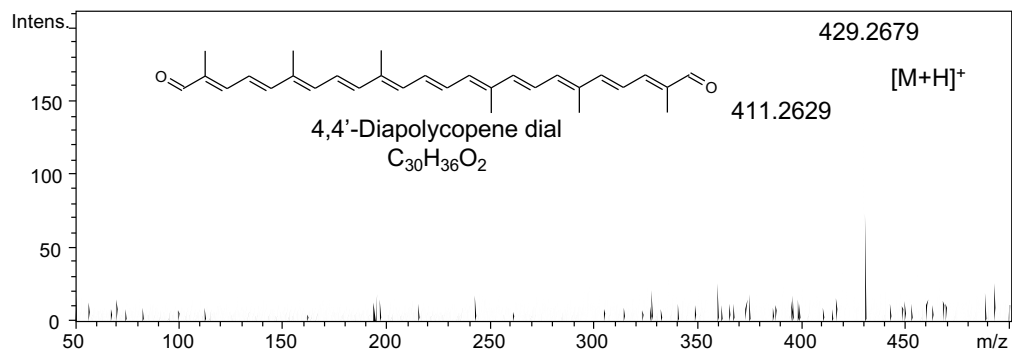

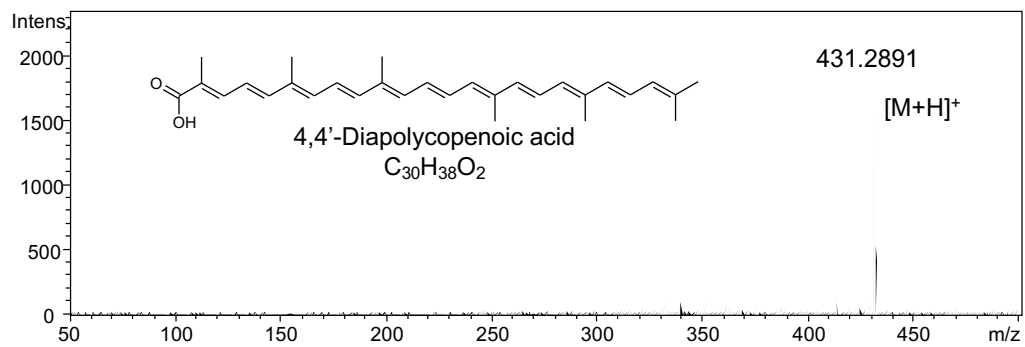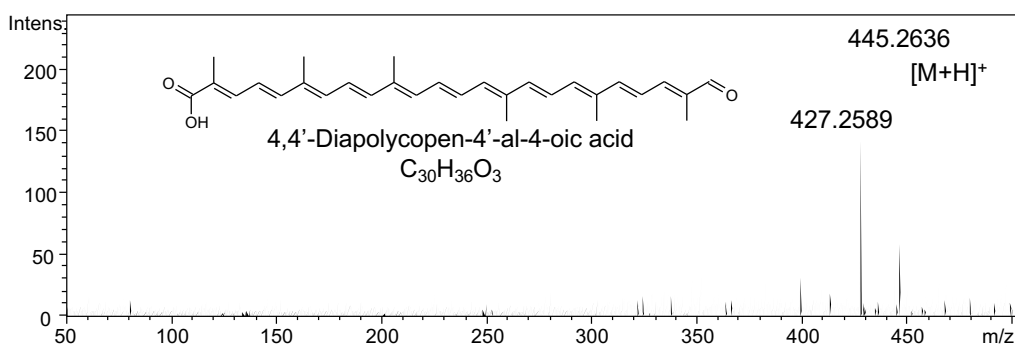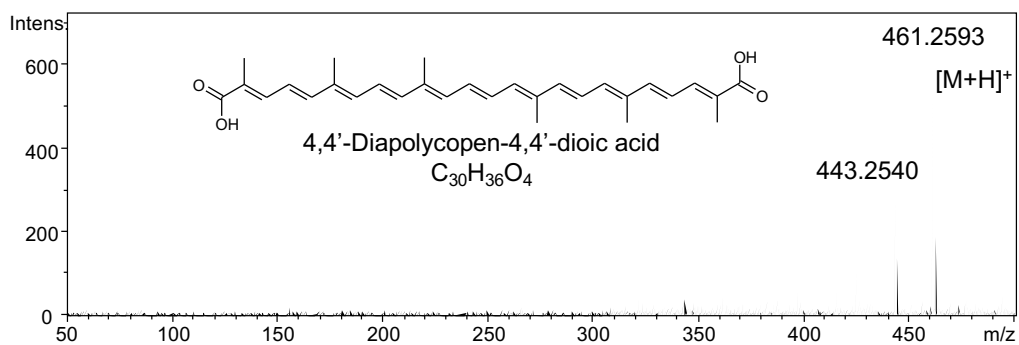

Mass spectra obtained by HPLC-MS(APCI) for the major C30 carotenoids produced by *P. limnophila*.

Fig. S4.

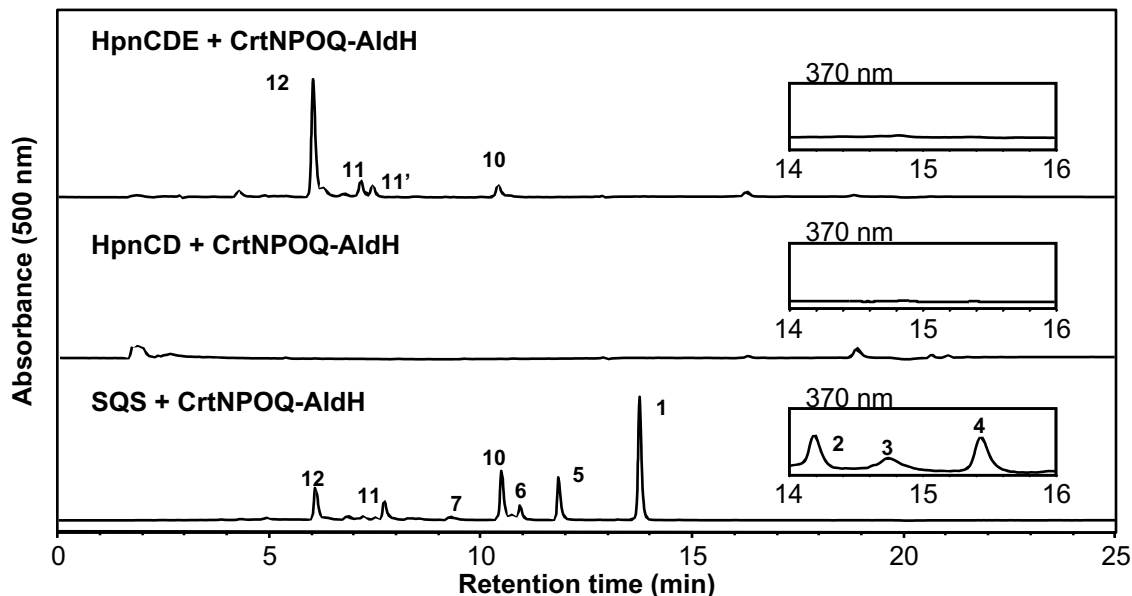

**Analysis of the carotenoid heterologous expression system.** HPLC chromatogram corresponding to the carotenoid analysis of *E. coli* recombinants bearing plasmid 1 (IPP supplier), a plasmid producing squalene (via HpnCDE or SQS) or its precursor (via HpnCD), and a plasmid containing *crtNPOQ-aldH* genes. Detection wavelengths at 370 and 500 nm. Peaks numbers as in Figure 2 and pathway scheme (Fig. 3). Peaks: 4,4'-diapolycopene (1); 4,4'-diaponeurosporene (2); 4,4'-diapo- $\zeta$ -carotene (3); 4,4'-diapophytofluene (4); 4,4'-diapolycopen-4-al (5); 4,4'-diapolycopen-4-ol (6); 4,4'-diapolycopene dial (7); 4,4'-diapolycopenoic acid (10); 4,4'-diapolycopen-4'-al-4-oic acid (11 & 11'); 4,4'-diapolycopen-4,4'-dioic acid (12).



Fig. S5.

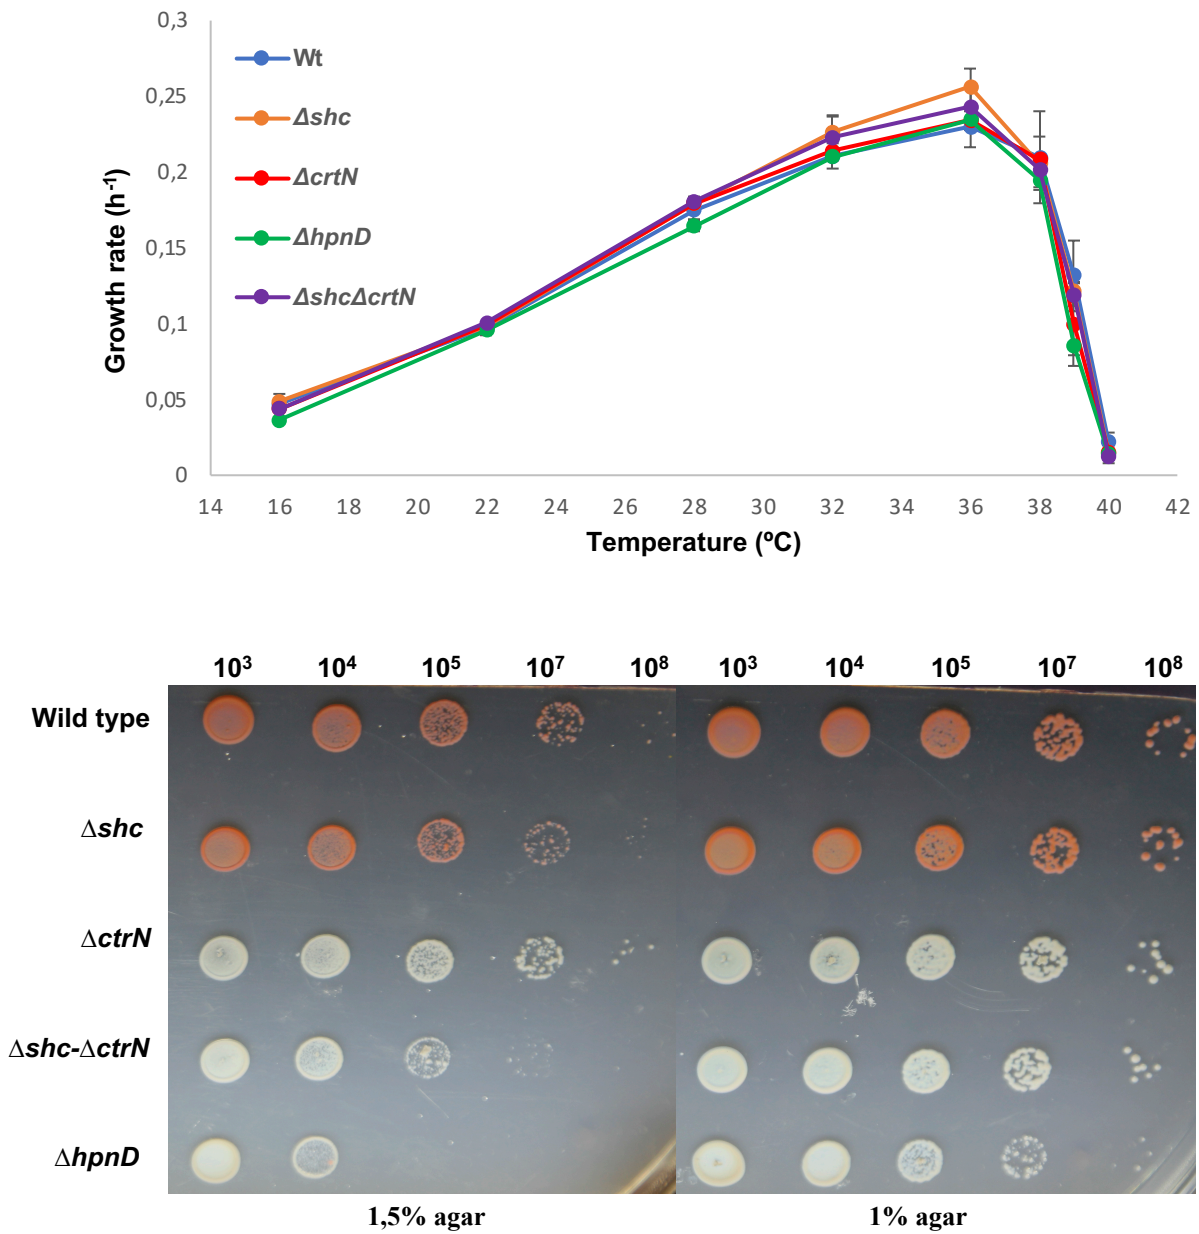

Phenotypic assays of selected *P. limnophila* mutants. a) growth rate at different temperatures (16-40°C) and b) growth in solid medium (1.5 % vs 1% agar).

Fig. S6.

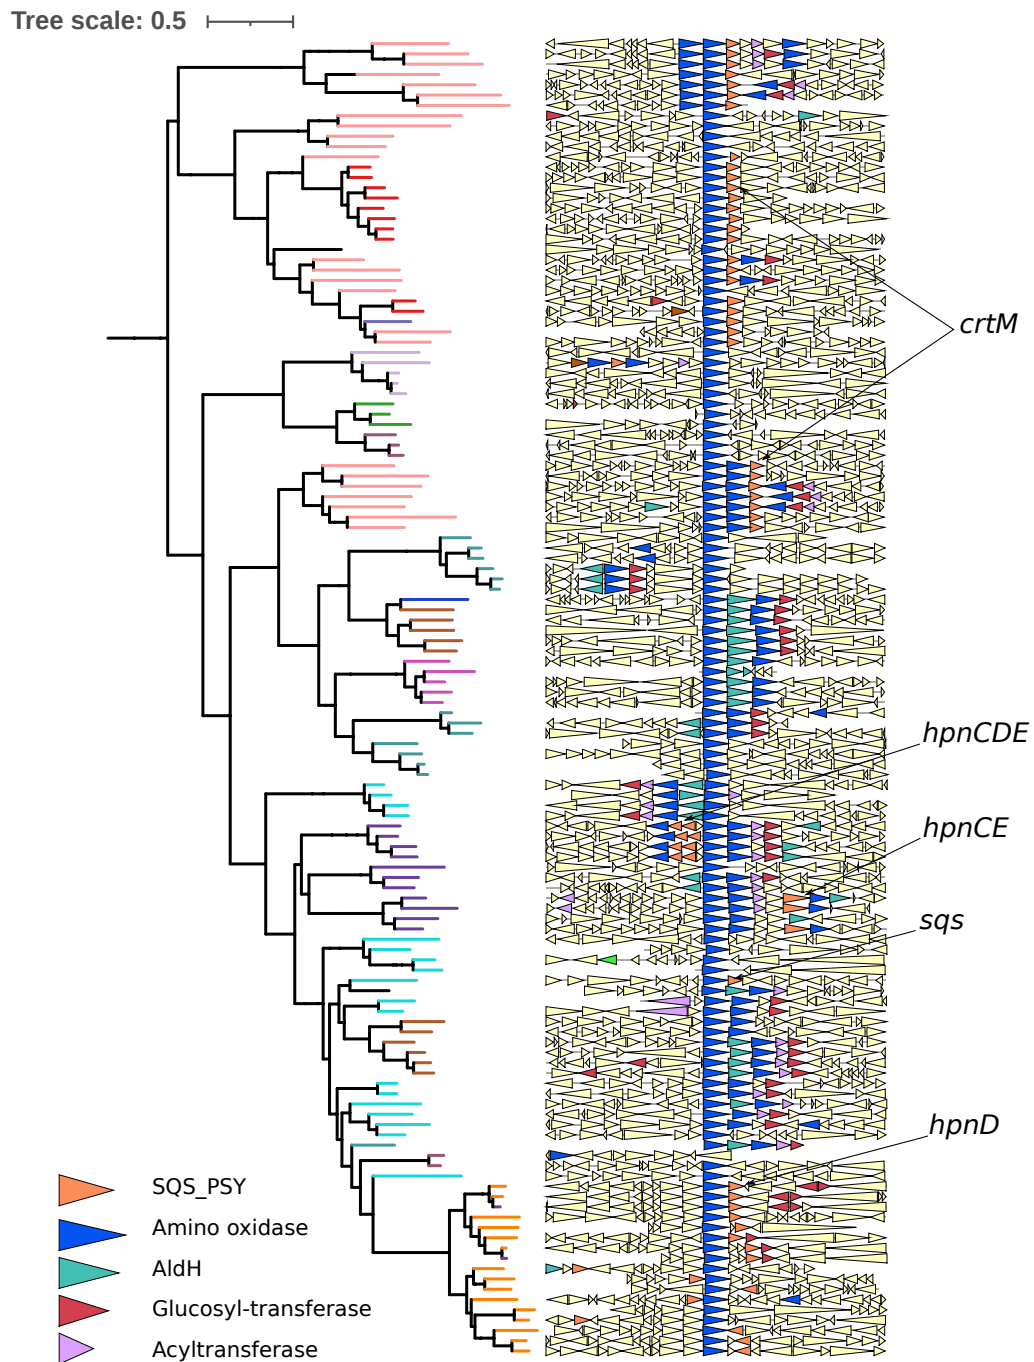

**Genomic context of *crtN* genes across prokaryotes.** Pruned tree of CrtN phylogeny and synteny of *crtN* gene across 10 Kb upstream and downstream. Colored genes contain Pfam domain of interest. The co-occurrence of possible sources of precursors in the genomic context of *crtN* are indicated (*crtM*, *hpnCDE* or *sqs*).

Fig. S7.

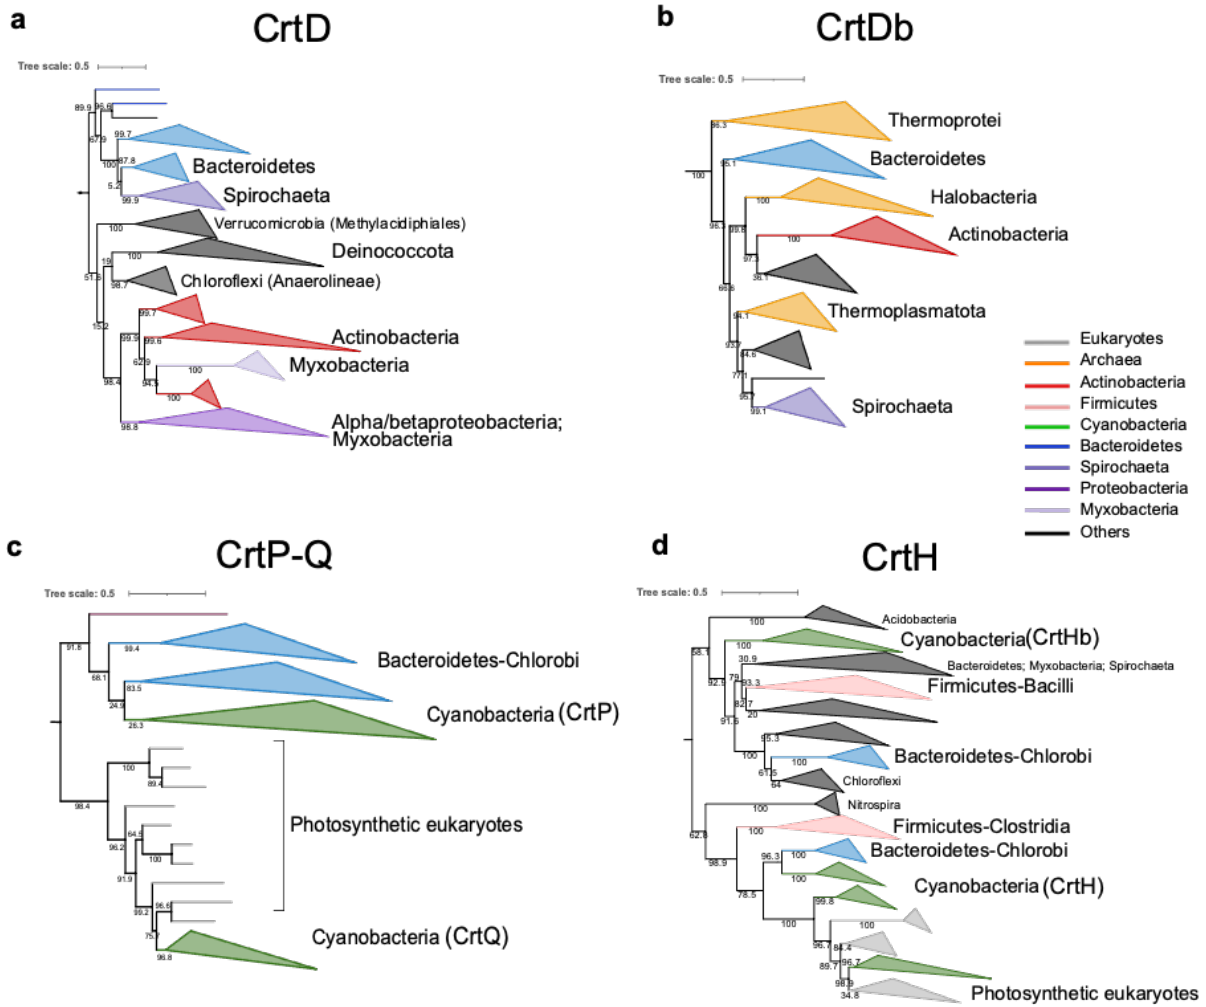

**Pruned subfamilies from the phylogeny of carotenoid amino oxidases.** a) CrtD b) CrtDb involved in the C50 pathway, c) CrtP-Q, and d) CrtH of the cyanobacterial pathway. Minor groups are indicated with collapsed branches in dark gray.

**Table S1.**  
**Strains used in this work.**

| Strain                                         | Description                                                                                                                                                        | Source     |
|------------------------------------------------|--------------------------------------------------------------------------------------------------------------------------------------------------------------------|------------|
| <b><i>Escherichia coli</i> strains:</b>        |                                                                                                                                                                    |            |
| DH5 $\alpha$                                   | F $\phi$ 80 <i>lacZ</i> $\Delta$ M15 $\Delta$ ( <i>lacZYA-argF</i> )U169 <i>recA1 endA1 hsdR17</i> (r <sub>K</sub> m <sub>K</sub> ) <i>supE44 thi-1 gyrA relA1</i> | 56         |
| BL21 Soluble                                   | F- <i>ompT hsdSB</i> (rB <sup>-</sup> mB <sup>-</sup> ) <i>gal dcm</i> (DE3) <sup>+</sup>                                                                          | 57         |
| <b><i>Planctopirus limnophila</i> strains:</b> |                                                                                                                                                                    |            |
| Wild type DSM3776                              | Wild type                                                                                                                                                          | 58         |
| DV060                                          | <i>hpnD'</i> ::tn5. Km <sup>R</sup> .                                                                                                                              | This study |
| DV062                                          | <i>crtO'</i> ::tn5. Km <sup>R</sup> .                                                                                                                              | This study |
| DV063                                          | <i>crtP'</i> ::tn5. Km <sup>R</sup> .                                                                                                                              | This study |
| DV064                                          | <i>aldH'</i> ::tn5. Km <sup>R</sup> .                                                                                                                              | This study |
| DV065                                          | <i>crtN'</i> ::tn5. Km <sup>R</sup> .                                                                                                                              | This study |
| DV066                                          | <i>hpnE'</i> ::tn5. Km <sup>R</sup> .                                                                                                                              | This study |
| DV067                                          | <i>crtQ'</i> ::tn5. Km <sup>R</sup> .                                                                                                                              | This study |
| DV003                                          | $\Delta$ SHC. Km <sup>R</sup> .                                                                                                                                    | This study |
| DV070                                          | $\Delta$ HpnC. Km <sup>R</sup> .                                                                                                                                   | This study |
| DV071                                          | $\Delta$ CrtN. Gm <sup>R</sup> .                                                                                                                                   | This study |
| DV072                                          | $\Delta$ SHC $\Delta$ CrtN. Km <sup>R</sup> Gm <sup>R</sup> .                                                                                                      | This study |
| DV073                                          | $\Delta$ HpnD. Km <sup>R</sup> .                                                                                                                                   | This study |

**Table S2.**  
**Oligonucleotides used in this work.**

| Oligonucleotide                             | Sequence                                                                                                                        | Notes                    |
|---------------------------------------------|---------------------------------------------------------------------------------------------------------------------------------|--------------------------|
| <b>For mutagenesis:</b>                     |                                                                                                                                 |                          |
| Km fwd                                      | <u>GTTGGATCC</u> GGCGTCGGCTTGAACGAATTG                                                                                          | BamHI                    |
| Km rv                                       | TGAGGATCCATTTCGAACCCAGAGTCC                                                                                                     | BamHI                    |
| Gm pBBRMCS5 fwd                             | <u>TCAAGGATCC</u> GTTGACATAAGCCTGTTCCGG                                                                                         | BamHI                    |
| Gm pBBRMCS5 fwd                             | CAT <u>GGATCC</u> TTAGGTTGGCGTACTTGGG                                                                                           | BamHI                    |
| Map Tn5 A fwd                               | ATCAGGACATAGCGTTGGC                                                                                                             | -                        |
| Map Tn5 B fwd                               | AAGAGCTTGGCGCGAATG                                                                                                              | -                        |
| Left Limno HpnC fwd                         | TACAG <u>GAATC</u> CTTTAACACTCGTGACCAC                                                                                          | EcoRI                    |
| Left Limno HpnC rv                          | CGAGGATCCAAATCGTCCACCTAAAAGG                                                                                                    | BamHI                    |
| Right Limno HpnC fwd                        | CGAGGATCCTTTCAGGTAAGGGTAGCGAC                                                                                                   | BamHI                    |
| Right Limno HpnC rv                         | ACAAAGCTTCAAGTCATCAAGAGAGTATCG                                                                                                  | HindIII                  |
| Left Limno HpnD fwd                         | ATTCGGAATTCCTTACAGCC                                                                                                            | -                        |
| Left Limno HpnD rv                          | TTAGGATCCAAGACCTCTGGATTTCCGC                                                                                                    | BamHI                    |
| Right Limno HpnD fwd                        | TTAGGATCCTTCGGTTGCCATGATGGAAC                                                                                                   | BamHI                    |
| Right Limno HpnD rv                         | GTAAGCTTGATGGCATGAGCATGAAGG                                                                                                     | HindIII                  |
| Left Limno Crtn fwd                         | TATGAGCTCATTACCCGGTTGCACCCAG                                                                                                    | SacI                     |
| Left Limno Crtn rv                          | TATGGATCCTCACAACCTCCTCTGGGGAAG                                                                                                  | BamHI                    |
| Right Limno Crtn fwd                        | TATGGATCCAGGCTGAATGTCGAGTCGAATG                                                                                                 | BamHI                    |
| Right Limno Crtn rv                         | TATAGCTTAGTTCATTGAGCCGTCCAGG                                                                                                    | HindIII                  |
| Left Plim_1904 fwd                          | GGTAGAGCTCGAGGACGTCCACTCCGGC                                                                                                    | SacI                     |
| Left Plim_1904 rv                           | CTTGGATCCTTCAGGAGCCCTCCATCC                                                                                                     | BamHI                    |
| Right Plim_1904 fwd                         | GGTAGGATCCGTGAGCCAGTCAGCTGATG                                                                                                   | BamHI                    |
| Right Plim_1904 rv                          | CTTGAAGCTTTGCCCTGGTATCAGTTGG                                                                                                    | HindIII                  |
| <b>For Escherichia coli reconstruction:</b> |                                                                                                                                 |                          |
| Lacl fwd                                    | ATGACGTCGGTCGGAAGCATAAAGTG                                                                                                      | AatII                    |
| Lacl rv                                     | ACTGTCGACACATTATACGAGCCGGAAGCATAAAGTGTAAGCCCGAACATTATCCAGAACGGGAG                                                               | Sall                     |
| SQS Nostoc fwd                              | TACGTCGACTTGTGAGCGGATAACAATTTCCAGAGGAGTGAAAACATGG                                                                               | Sall                     |
| SQS Nostoc rv                               | ACTGTCGCGA <sup>ACT</sup> CACCCAGCTTTCAAGTTG                                                                                    | NruI                     |
| HpnC fwd                                    | TACGTCGACTTGTGAGCGGATAACAATTTCCGAAAGAGGAGAAATACTAGATGCCTGAGAGTAGGGAACG                                                          | Sall                     |
| HpnC rv                                     | TACCTCGCGAATCTAGACTCGAGGATGCTTACTCGAAATCAGCCAAAAAAC                                                                             | SphI-XhoI-XbaI-NruI      |
| HpnD fwd                                    | <u>GCATGCG</u> AAAGAGGAGAAATACTAGATGGCTCTGCCCTGCATC                                                                             | SphI                     |
| HpnD rv                                     | CTTCTCGAGGGCAACCGAATCACGGCCTG                                                                                                   | XhoI                     |
| HpnE b fwd                                  | CTTCTCGAGGAAAGAGGAGAAATACTAGATGGAGCGAGTGACAATTGTGG                                                                              | XhoI                     |
| HpnE rv                                     | TCTCTAGATTAAAGACAACCTTCCCCAGACC                                                                                                 | XbaI                     |
| PlacUV5_car fwd                             | AATTCTTTACACTTTATGCTTCCGGCTCGTATAATGTGCTGACTTGTGAGCGGATAACAATTTCCGAAAGAGGAGAAATACCATATG<br>TGTAGAGCTTAGCTAGCTATCTCGAGATACGCGTAT | NdeI-SacI-NheI-XhoI-MluI |
| PlacUV5_car Rv                              | AGCTTACGCGTATCTCGAGATAGCTAGCTAGAGCTCTACATATGGTATTTCTCCTTTCCGAAATGTTATCCGCTCACAAGTGC<br>ACACATTATACGAGCCGGAAGCATAAAGTGTAAAG      | NdeI-SacI-NheI-XhoI-MluI |
| CrtN fwd                                    | TATCATATGGAGAGTGATGTCATCATTG                                                                                                    | NdeI                     |
| CrtN rv                                     | TATGAGCTCTAACCTATCGAAGTCTTGCTG                                                                                                  | SacI                     |
| CrtP fwd                                    | TATGCTAGCGAAAGAGGAGAAATACTAGATGATTAATCAAACAACGCAGC                                                                              | NheI                     |
| CrtP rv                                     | TATCCTCGAGTTATCGCCCTGCCGTAACC                                                                                                   | XhoI                     |
| AldH fwd                                    | TATGAGCTCGAAAGAGGAGAAATACTAGATGGCTCTAACTGATGTGATGC                                                                              | SacI                     |
| AldH rv                                     | TATGCTAGCTTATCTGCTCCATAAAATTTTGGAG                                                                                              | NheI                     |
| CrtQ fwd                                    | TATACGCGTGAAAGAGGAGAAATACTAGATGCTGCTGTTTTGCTGTC                                                                                 | MluI                     |
| CrtQ rv                                     | TAAAAGCTTCTACTTCCACCATCGCACCC                                                                                                   | HindIII                  |
| CrtO fwd                                    | TATCCTCGAGGAAAGAGGAGAAATACTAGATGACGGGCCGAATCAGAC                                                                                | XhoI                     |
| CrtO rv                                     | TATACGCGTTTAGTGGCTAGCTGGGGGC                                                                                                    | MluI                     |

Underlined sequences indicate restriction sites for cloning purpose.

**Table S3.****Plasmids used in this work.**

| Plasmid                                      | Description                                                                                                                                                                                                    | Source     |
|----------------------------------------------|----------------------------------------------------------------------------------------------------------------------------------------------------------------------------------------------------------------|------------|
| <b>For <i>P. limnophila</i> mutagenesis:</b> |                                                                                                                                                                                                                |            |
| pEX18Tc                                      | Suicide plasmid. SacB.Tet <sup>R</sup> .                                                                                                                                                                       | 59         |
| pDV008                                       | 1065 bp upstream and 1346 bp downstream of squalene hopene cyclase ( <i>shc</i> ) gene from <i>P. limnophila</i> flanking a kanamycin resistance gene cloned into pEX18Tc. Km <sup>r</sup> , Tc <sup>r</sup> . | This study |
| pDV103                                       | 859 bp upstream and 827 bp downstream of <i>hpnC</i> gene from <i>P. limnophila</i> flanking a kanamycin resistance gene cloned into pEX18Tc. Km <sup>r</sup> , Tc <sup>r</sup> .                              | This study |
| pDV111                                       | 837 bp upstream and 838 bp downstream of <i>crtN</i> gene from <i>P. limnophila</i> flanking a kanamycin resistance gene cloned into pEX18Tc. Gm <sup>r</sup> , Tc <sup>r</sup> .                              | This study |
| pDV118                                       | 776 bp upstream and 777 bp downstream of <i>hpnD</i> gene from <i>P. limnophila</i> flanking a kanamycin resistance gene cloned into pEX18Tc. Km <sup>r</sup> , Tc <sup>r</sup> .                              | This study |
| <b>For <i>E. coli</i> reconstruction:</b>    |                                                                                                                                                                                                                |            |
| <b>Category 1:</b>                           |                                                                                                                                                                                                                |            |
| pBbA5c-MevT(CO)<br>MBis (CO, ispA)           | p15A ori, AtoB(co)-HMGS(co)-HMGR(co)-MK(co)-PMK(co)-PMD-Idi-IspA. Cm <sup>R</sup> .                                                                                                                            | Addgene    |
| <b>Category 2:</b>                           |                                                                                                                                                                                                                |            |
| pBR322                                       | pBR322 ori. Amp <sup>R</sup> Tet <sup>R</sup> .                                                                                                                                                                | 60         |
| pDV105                                       | pBR322 ori, lacUV5 promoter, <i>lacI<sup>q</sup></i> . Amp <sup>R</sup> .                                                                                                                                      | This study |
| pDV106                                       | <i>Anabaena</i> sp. PCC 7120 squalene synthase (SQS) expression plasmid. Derived from pDV105.                                                                                                                  | This study |
| pDV120                                       | <i>P. limnophila</i> HpnCDE expression plasmid. Codon optimize for <i>Escherichia coli</i> . Derived from pDV105.                                                                                              | This study |
| pDV122                                       | <i>P. limnophila</i> HpnCD expression plasmid. Codon optimize for <i>E. coli</i> . Derived from pDV105.                                                                                                        | This study |
| <b>Category 3:</b>                           |                                                                                                                                                                                                                |            |
| pSEVA231                                     | pBBR1 ori, Km <sup>R</sup> .                                                                                                                                                                                   | 61         |
| pDV112                                       | pBBR ori, lacUV5 promoter, Km <sup>R</sup> .                                                                                                                                                                   | This study |
| pDV113                                       | <i>P. limnophila</i> CrtN expression plasmid. Derived from pDV112.                                                                                                                                             | This study |
| pDV115                                       | <i>P. limnophila</i> CrtN-CrtP expression plasmid. Derived from pMPO112.                                                                                                                                       | This study |
| pDV114                                       | <i>P. limnophila</i> CrtN-CrtP-AldH expression plasmid. Derived from pDV112.                                                                                                                                   | This study |
| pDV123                                       | <i>P. limnophila</i> CrtN-CrtP-AldH-CrtQ expression plasmid. Derived from pDV112.                                                                                                                              | This study |
| pDV117                                       | <i>P. limnophila</i> CrtN-CrtP-AldH-CrtQ-CrtO expression plasmid. Derived from pDV112.                                                                                                                         | This study |



**Data S1. (separate file)**

**Distribution of the main enzymes of this analysis.** Distribution of the main enzymes involved in polycyclic triterpene and carotenoid biosynthetic pathways across bacteria, archaea and some eukaryotes. The names of the phyla and classes are according to GTDB taxonomy and are sorted alphabetically by phylum. Numbers indicate the number of genomes with at least one respective gene.

**Data S2. (separate file)**

**Copy number of the main enzymes of this analysis.** Presence and number of copies of carotenoid amino oxidases and Trans IPPS HHs in the genomic context of *crtN* across the analyzed bacteria. Numbers indicate the number of copies in the genomic context of each subfamily. Light gray denotes low number of gene copies, and dark gray denotes higher number of gene copies in the respective genome contexts.
